# Supplementary material for: Photochemical Transformations of Diverse Biologically Active Resveratrol Analogs in Batch and Flow Reactors
Source: MDPI journal article supplement (doi:10.3390/molecules29010201), 2023-12-29
Supplement: s1 [file s1]

# Photochemical Transformations of Diverse Biologically Active Resveratrol Analogs in Batch and Flow Reactors

Milena Mlakić <sup>1</sup>, Hana Perinić <sup>1,2</sup>, Vitomir Vušak <sup>2,\*</sup>, Ottó Horváth <sup>3</sup>, Diego Sampedro <sup>4</sup>, Raúl Losantos <sup>4</sup>, Ilijana Odak <sup>5</sup> and Irena Škorić <sup>1,\*</sup>

<sup>1</sup> Department of Organic Chemistry, Faculty of Chemical Engineering and Technology, University of Zagreb, Marulićev trg 19, HR-10 000 Zagreb, Croatia; mdragojev@fkit.unizg.hr (M.M.); hperinic@fkit.hr (H.P.)

<sup>2</sup> Pliva R&D, Teva Pharmaceutical Industries Ltd., Prilaz baruna Filipovića 29, HR-10 000 Zagreb, Croatia

<sup>3</sup> Environmental and Inorganic Photochemistry Research Group, Center for Natural Sciences, Faculty of Engineering, University of Pannonia, P.O. Box 1158, H-8210 Veszprém, Hungary; horvath.otto@mk.uni-pannon.hu

<sup>4</sup> Departamento de Química, Centro de Investigación en Síntesis Química (CISQ), Universidad de La Rioja, 26006 Logroño, Spain; diego.sampedro@unirioja.es (D.S.); raul.losantos@unirioja.es (R.L.)

<sup>5</sup> Department of Chemistry, Faculty of Science and Education, University of Mostar, Matice Hrvatske bb, 88000 Mostar, Bosnia and Herzegovina; ilijana.odak@fpmoz.sum.ba

\* Correspondence: vitomir.vusak@pliva.com (V.V.); iskoric@fkit.unizg.hr (I.Š.)

## Content:

|                                                                                                                              |    |
|------------------------------------------------------------------------------------------------------------------------------|----|
| 1. Orbitals included in the active space (12,12).....                                                                        | 1  |
| 2. Optimized Geometries coordinates.....                                                                                     | 2  |
| 3. Spectral series recorded during the direct irradiations of the various <i>cis</i> -isomers in time at 313 and 365 nm..... | 9  |
| 4. Chromatograms for data in Table 8.....                                                                                    | 11 |
| 5. NMR spectra of starting compounds, photoproducts and photomixtures.....                                                   | 15 |

**Citation:** Mlakić, M.; Perinić, H.; Vušak, V.; Horváth, O.; Sampedro, D.; Losantos, R.; Odak, I.; Škorić, I. Photochemical Transformations of Diverse Biologically Active Resveratrol Analogs in Batch and Flow Reactors. *Molecules* **2024**, *29*, x. <https://doi.org/10.3390/xxxxx>

Academic Editor: Shengjie Wang

Received: 30 November 2023

Revised: 22 December 2023

Accepted: 27 December 2023

Published: 29 December 2023

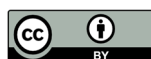

**Copyright:** © 2023 by the authors. Submitted for possible open access publication under the terms and conditions of the Creative Commons Attribution (CC BY) license (<https://creativecommons.org/licenses/by/4.0/>).

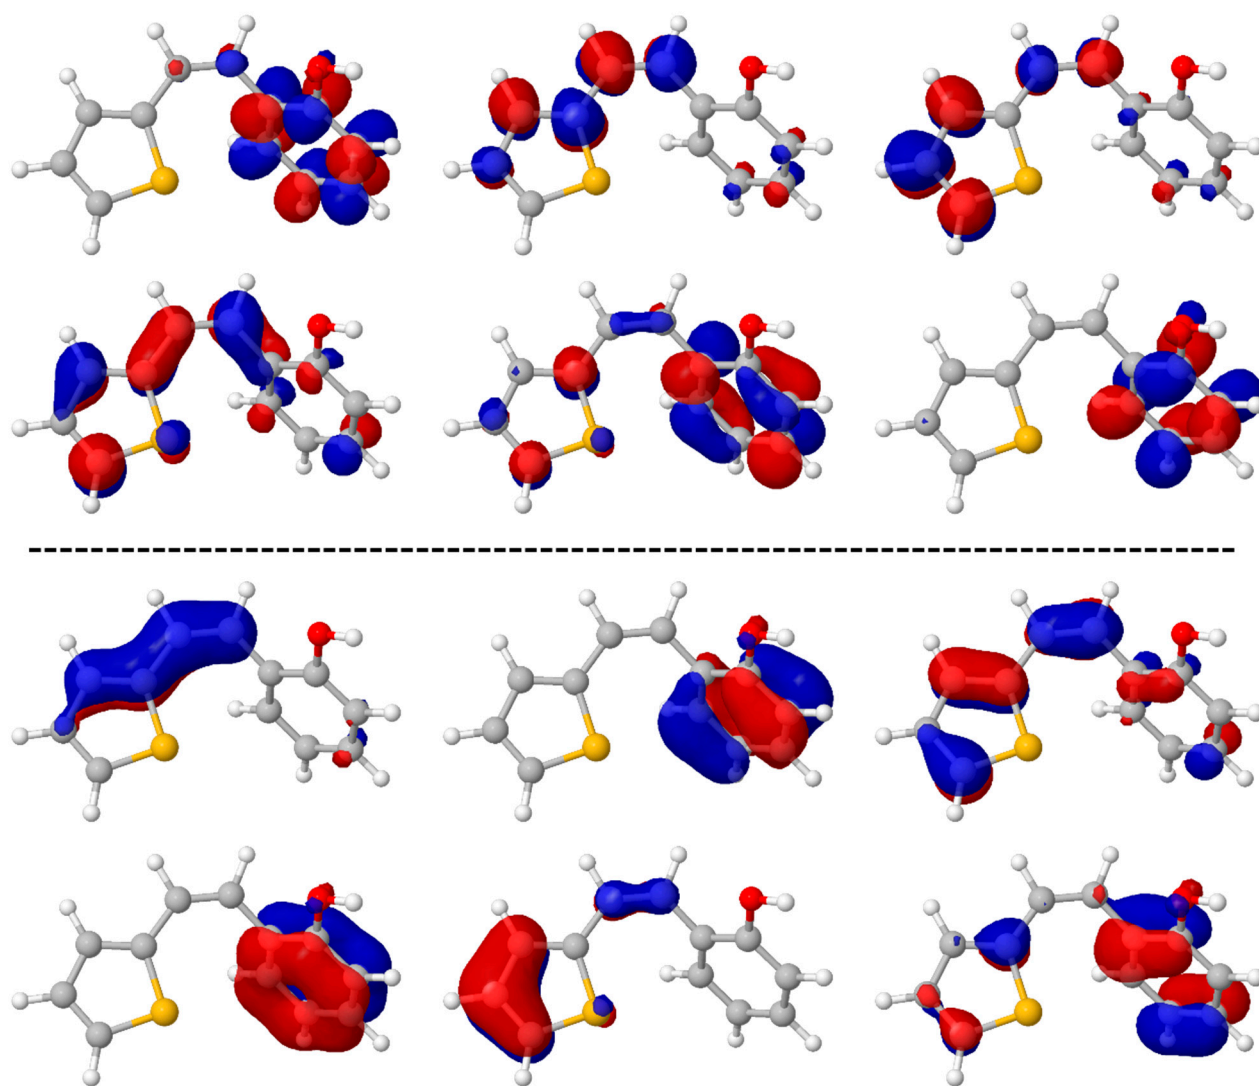

Figure S1. Orbitals included in the active space (12,12).

---

---

## 2. Optimized Geometries coordinates

*cis-1*

|   |             |             |             |
|---|-------------|-------------|-------------|
| C | -2.34912146 | -2.83721517 | 0.32746740  |
| S | -0.69808801 | -2.29338239 | 0.22038612  |
| C | -1.21224600 | -0.64319055 | -0.11274048 |
| C | -2.58064195 | -0.57109337 | -0.12386376 |
| C | -3.23484975 | -1.82768457 | 0.12096442  |
| C | -0.34285525 | 0.52548167  | -0.25202138 |
| C | 0.99923626  | 0.64265601  | -0.34999265 |
| C | 2.02699990  | -0.41816300 | -0.48403727 |
| C | 3.12723392  | -0.43174642 | 0.38950750  |
| C | 4.14358887  | -1.37314254 | 0.24758984  |
| C | 4.08761555  | -2.31327051 | -0.78456777 |
| C | 3.01645986  | -2.30276838 | -1.67652697 |
| C | 2.00057940  | -1.35654550 | -1.52318680 |
| O | 3.15417780  | 0.51259682  | 1.36762991  |
| H | 4.97117549  | -1.37531072 | 0.93741124  |
| H | 4.87610422  | -3.03702732 | -0.88682149 |
| H | 2.97103020  | -3.01388893 | -2.48168011 |
| H | 1.17984151  | -1.33839736 | -2.21573463 |
| H | 3.92371646  | 0.40692719  | 1.90802397  |
| H | 1.38959225  | 1.64464932  | -0.32533343 |
| H | -0.89681322 | 1.44879733  | -0.22964683 |
| H | -3.11102387 | 0.34931551  | -0.28742356 |
| H | -4.30158051 | -1.95016447 | 0.14080128  |
| H | -2.56236265 | -3.86786269 | 0.52717946  |

*cis-1-isom*

|   |             |             |             |
|---|-------------|-------------|-------------|
| C | -3.03300176 | -2.36377236 | -0.19868236 |
| S | -2.80040865 | -0.70493161 | -0.66885509 |
| C | -1.11856660 | -0.73751505 | -0.15332330 |
| C | -0.79903983 | -1.97050482 | 0.34592535  |
| C | -1.89566605 | -2.90268143 | 0.31722412  |
| C | -0.33018305 | 0.49853045  | -0.23870226 |
| C | 1.00873996  | 0.65267975  | -0.30963780 |
| C | 2.04808998  | -0.39213461 | -0.46536871 |
| C | 3.17279282  | -0.38658358 | 0.37424800  |
| C | 4.18900814  | -1.32751404 | 0.21913658  |
| C | 4.10464426  | -2.28767307 | -0.79065029 |
| C | 3.00351922  | -2.30056957 | -1.64608838 |

---

|   |             |             |             |
|---|-------------|-------------|-------------|
| C | 1.99045107  | -1.35560378 | -1.48032098 |
| O | 3.22104277  | 0.56806207  | 1.34180965  |
| H | 5.03725393  | -1.31328769 | 0.88298848  |
| H | 4.89282132  | -3.00979347 | -0.90475703 |
| H | 2.93726067  | -3.02668346 | -2.43628862 |
| H | 1.14615198  | -1.35588344 | -2.14432102 |
| H | 4.02599863  | 0.50010467  | 1.83466310  |
| H | 1.38136498  | 1.65993365  | -0.24978848 |
| H | -0.91558287 | 1.40125817  | -0.20882316 |
| H | 0.16815575  | -2.21365425 | 0.74115458  |
| H | -1.82185124 | -3.91323000 | 0.67405885  |
| H | -3.98392253 | -2.83878883 | -0.33232666 |

*trans*-1

|   |             |             |             |
|---|-------------|-------------|-------------|
| C | 1.75412925  | 2.17949264  | 0.05833662  |
| C | 3.16893397  | 2.16987005  | 0.01075835  |
| C | 3.88546327  | 3.33656821  | -0.01082022 |
| C | 3.23432316  | 4.57380224  | 0.02042995  |
| C | 1.84983360  | 4.61749724  | 0.07873412  |
| C | 1.12524489  | 3.42193895  | 0.10118830  |
| H | 4.96114483  | 3.29894697  | -0.05592030 |
| H | 3.81385330  | 5.47950359  | 0.00229168  |
| H | 1.33007360  | 5.55824247  | 0.11520140  |
| H | 0.05514598  | 3.46538889  | 0.17382041  |
| O | 3.76953695  | 0.95532409  | -0.02058462 |
| H | 4.71100455  | 1.05219000  | -0.03302007 |
| C | 1.02752524  | 0.89890666  | 0.07281712  |
| H | 1.62290968  | 0.03693863  | 0.30811373  |
| C | -0.28824721 | 0.73760064  | -0.19753484 |
| H | -0.88989179 | 1.58322808  | -0.48154357 |
| C | -1.01400577 | -0.52267209 | -0.16995985 |
| C | -2.32762250 | -0.71022342 | -0.49986458 |
| S | -0.28479497 | -2.08988717 | 0.31823970  |
| C | -2.77417521 | -2.07234230 | -0.37950207 |
| H | -2.96572783 | 0.09267145  | -0.82311042 |
| C | -1.79418935 | -2.91150973 | 0.04471124  |
| H | -3.77479011 | -2.39052823 | -0.60264951 |
| H | -1.86760451 | -3.96610388 | 0.21414542  |

**CI-cycle**

---

|   |             |             |             |
|---|-------------|-------------|-------------|
| C | -0.55067706 | -2.50569611 | -1.06306979 |
| C | -1.62576676 | -2.15316498 | 0.76701841  |
| C | -1.38831959 | -0.91707745 | 0.01911302  |
| C | -0.23327418 | -0.10159040 | -0.09679271 |
| C | 0.97476989  | -0.79270068 | -0.36183669 |
| C | 0.85390860  | -2.09116602 | -0.77992953 |
| C | -3.01552521 | -2.48023497 | 0.88059346  |
| C | -3.85438620 | -1.60527816 | 0.27216011  |
| S | -2.96585357 | -0.29838792 | -0.54556673 |
| C | -0.79501238 | -3.96723224 | -1.17245655 |
| C | 0.24605936  | -4.81783943 | -1.21251017 |
| C | 1.64051146  | -4.39198013 | -1.03054120 |
| C | 1.91042319  | -3.08573027 | -0.81825213 |
| O | 3.15350375  | -2.59145726 | -0.59680534 |
| H | 2.42235058  | -5.13017501 | -1.05212349 |
| H | 0.06258366  | -5.86319367 | -1.38847790 |
| H | -1.80202599 | -4.30784118 | -1.32085902 |
| H | -0.99052586 | -1.97343643 | -1.88912684 |
| H | 3.78887351  | -3.29400559 | -0.59523213 |
| H | 1.93379413  | -0.31691379 | -0.26660688 |
| H | -0.34309129 | 0.94677959  | -0.29869543 |
| H | -0.85949889 | -2.58090820 | 1.37965071  |
| H | -3.35844232 | -3.33441591 | 1.43432859  |
| H | -4.92448884 | -1.61025179 | 0.26475724  |

#### 1-MinSi

|   |             |             |             |
|---|-------------|-------------|-------------|
| C | -1.64400900 | -0.14677500 | 0.00051700  |
| C | -2.57300000 | 0.94738100  | 0.00200100  |
| C | -3.94516000 | 0.73983600  | 0.00060600  |
| C | -4.45426500 | -0.56032700 | -0.00261900 |
| C | -3.57897800 | -1.65289700 | -0.00459900 |
| C | -2.21136700 | -1.45842500 | -0.00317200 |
| H | -4.61928900 | 1.59413300  | 0.00196600  |
| H | -5.52844400 | -0.71723300 | -0.00365900 |
| H | -3.97895300 | -2.66248900 | -0.00740700 |
| H | -1.55090700 | -2.31904000 | -0.00548300 |
| O | -2.03478100 | 2.18779000  | 0.00500900  |
| H | -2.74344200 | 2.84359200  | 0.00595800  |
| C | -0.25439200 | 0.11403600  | 0.00266700  |
| H | 0.04739100  | 1.15793200  | 0.00389300  |

---

|   |            |             |             |
|---|------------|-------------|-------------|
| C | 0.74920400 | -0.86221800 | 0.00428600  |
| H | 0.48586600 | -1.91695100 | 0.00758300  |
| C | 2.11940800 | -0.57376400 | 0.00255100  |
| C | 3.21954000 | -1.45466300 | 0.00547600  |
| S | 2.70109100 | 1.10837400  | -0.00505600 |
| C | 4.45152600 | -0.79458800 | 0.00163400  |
| H | 3.09473600 | -2.53140000 | 0.01033000  |
| C | 4.33848600 | 0.58654700  | -0.00399800 |
| H | 5.41029400 | -1.30088200 | 0.00310900  |
| H | 5.14158600 | 1.31118400  | -0.00756100 |

# ISC T<sub>2</sub>S<sub>1</sub>

|   |             |             |             |
|---|-------------|-------------|-------------|
| C | 1.99942900  | 1.59866600  | -0.88705400 |
| C | 3.38962700  | 1.55085800  | -0.56925600 |
| C | 4.25396200  | 2.58351400  | -0.92716800 |
| C | 3.76998400  | 3.69355600  | -1.60995900 |
| C | 2.42231800  | 3.77810300  | -1.93853800 |
| C | 1.55196900  | 2.75724300  | -1.58806500 |
| H | 5.30926700  | 2.51592400  | -0.66920300 |
| H | 4.45230300  | 4.49352800  | -1.88443600 |
| H | 2.04620800  | 4.64582500  | -2.47177100 |
| H | 0.50339700  | 2.84131000  | -1.85400900 |
| O | 3.82386500  | 0.45534300  | 0.09537300  |
| H | 4.77265100  | 0.53281900  | 0.25576000  |
| C | 1.16011400  | 0.54288300  | -0.50999000 |
| H | 1.60374600  | -0.29363400 | 0.02281700  |
| C | -0.24386900 | 0.50432800  | -0.78119300 |
| H | -0.71770500 | 1.33136400  | -1.30254700 |
| C | -1.05170800 | -0.53765400 | -0.41288300 |
| C | -2.43483300 | -0.74536300 | -0.58987900 |
| S | -0.35718500 | -1.94239400 | 0.44949700  |
| C | -2.87147900 | -1.96724800 | -0.05335500 |
| H | -3.06887000 | -0.02264000 | -1.08979100 |
| C | -1.87713900 | -2.70912300 | 0.53078300  |
| H | -3.90167200 | -2.30370100 | -0.09170900 |
| H | -1.97686200 | -3.67622200 | 1.00646200  |

# IC T<sub>1</sub> T<sub>2</sub>

|   |            |            |             |
|---|------------|------------|-------------|
| C | 1.98880900 | 1.65093700 | -0.91693700 |
| C | 3.34864200 | 1.57853300 | -0.59264600 |
| C | 4.34800300 | 2.69730600 | -0.96526900 |
| C | 3.87055000 | 3.79169000 | -1.63599700 |

---

|   |             |             |             |
|---|-------------|-------------|-------------|
| C | 2.51090900  | 3.88049100  | -1.96867500 |
| C | 1.52641800  | 2.75778400  | -1.59141700 |
| H | 5.39380900  | 2.58920800  | -0.68822600 |
| H | 4.53563600  | 4.60326400  | -1.91852900 |
| H | 2.13043100  | 4.74995400  | -2.50148200 |
| H | 0.48683400  | 2.87641800  | -1.87302300 |
| O | 3.84782800  | 0.51527100  | 0.06649800  |
| H | 4.79944000  | 0.63181600  | 0.20561800  |
| C | 1.12767100  | 0.50535900  | -0.50139000 |
| H | 1.64706500  | -0.30026600 | 0.02644300  |
| C | -0.16586700 | 0.40872100  | -0.72201700 |
| H | -0.69092100 | 1.20365000  | -1.24522100 |
| C | -1.04969900 | -0.71326500 | -0.32384700 |
| C | -2.38419300 | -0.80187100 | -0.55404600 |
| S | -0.48591900 | -2.11944100 | 0.52077200  |
| C | -2.98070800 | -2.00960100 | -0.05203000 |
| H | -2.94184300 | -0.02582000 | -1.07122300 |
| C | -2.06108900 | -2.81021400 | 0.55271700  |
| H | -4.02416500 | -2.25681600 | -0.13989600 |
| H | -2.22012000 | -3.77582800 | 1.01971100  |

#### ISC T<sub>1</sub> S<sub>0</sub> 66°

|   |             |             |             |
|---|-------------|-------------|-------------|
| C | 1.91753000  | 1.60447500  | -0.29055200 |
| C | 3.33155400  | 1.78249600  | -0.18965200 |
| C | 4.06622400  | 2.29876600  | -1.24508900 |
| C | 3.43127300  | 2.66102100  | -2.43488700 |
| C | 2.04997100  | 2.50370700  | -2.56555100 |
| C | 1.31072700  | 1.98877400  | -1.51632500 |
| H | 5.14231900  | 2.42484400  | -1.14021500 |
| H | 4.01861600  | 3.06743200  | -3.25178400 |
| H | 1.55338400  | 2.78720600  | -3.48828600 |
| H | 0.23548800  | 1.87680600  | -1.61142200 |
| O | 3.90703700  | 1.42036400  | 0.98726000  |
| H | 4.85795800  | 1.57078100  | 0.93248200  |
| C | 1.19233500  | 1.07849000  | 0.79910100  |
| H | 1.73517200  | 0.89879100  | 1.72380200  |
| C | -0.24088100 | 0.78858700  | 0.79697700  |
| H | -0.87126600 | 1.32223200  | 1.50924900  |
| C | -0.87067700 | -0.17999100 | 0.03226600  |
| C | -2.24251100 | -0.51822600 | 0.02962400  |
| S | -0.00435500 | -1.23433100 | -1.08794000 |
| C | -2.55527800 | -1.58097800 | -0.83148900 |

---

|   |             |             |             |
|---|-------------|-------------|-------------|
| H | -2.96116900 | 0.00351700  | 0.65111200  |
| C | -1.45911800 | -2.07236400 | -1.50246400 |
| H | -3.55410200 | -1.98377400 | -0.95645500 |
| H | -1.43271100 | -2.88134300 | -2.21987500 |

#### ISC T<sub>1</sub> S<sub>0</sub> 122<sup>o</sup>

|   |             |             |             |
|---|-------------|-------------|-------------|
| C | 1.97074100  | 1.64885900  | -0.51656300 |
| C | 3.37843400  | 1.71403900  | -0.28079300 |
| C | 4.20715900  | 2.46976900  | -1.09508400 |
| C | 3.67792900  | 3.18266900  | -2.17217700 |
| C | 2.30803900  | 3.13007100  | -2.43875500 |
| C | 1.47499000  | 2.37914100  | -1.62909100 |
| H | 5.27568300  | 2.50553800  | -0.89032100 |
| H | 4.33860600  | 3.77575400  | -2.79658500 |
| H | 1.89733300  | 3.67818600  | -3.28068200 |
| H | 0.41029000  | 2.33100900  | -1.83857700 |
| O | 3.85112500  | 1.00433300  | 0.77705200  |
| H | 4.81051400  | 1.09669400  | 0.81623800  |
| C | 1.13649300  | 0.88985900  | 0.32768500  |
| H | 1.59738500  | 0.34309200  | 1.14731400  |
| C | -0.32135900 | 0.81762800  | 0.18175400  |
| H | -0.91702900 | 1.71813800  | 0.33741700  |
| C | -1.00596300 | -0.34870400 | -0.10647500 |
| C | -2.40028300 | -0.54807800 | -0.21493900 |
| S | -0.16754800 | -1.87285300 | -0.40625500 |
| C | -2.75157500 | -1.87098500 | -0.52600000 |
| H | -3.10892400 | 0.25804300  | -0.06456100 |
| C | -1.66448500 | -2.70339300 | -0.65908900 |
| H | -3.77317800 | -2.21209900 | -0.64878500 |
| H | -1.66685500 | -3.75942400 | -0.89284200 |

### 3. Spectral series recorded during the direct irradiations of the various *cis*-isomers in time at 313 and 365 nm



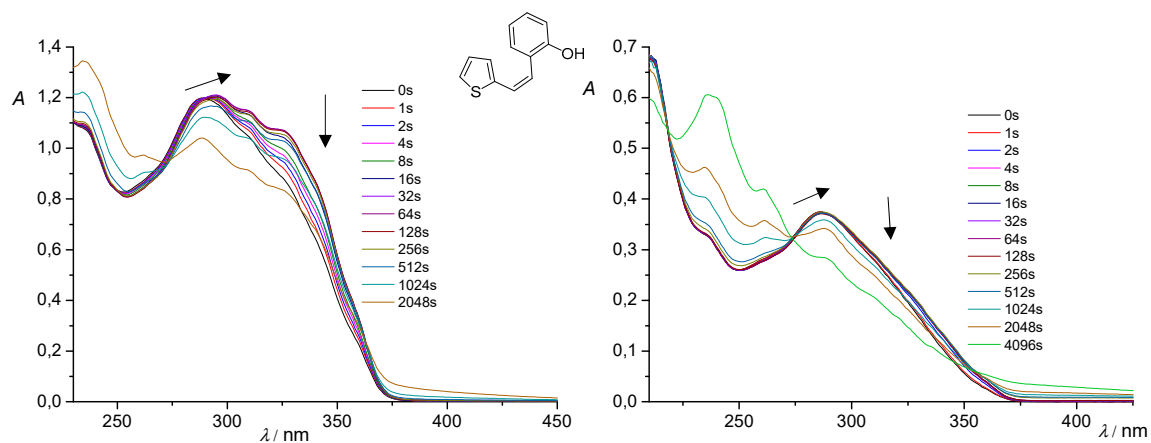

Figure S2. Compound *cis-1*: 300 nm (left); 350 nm (right).

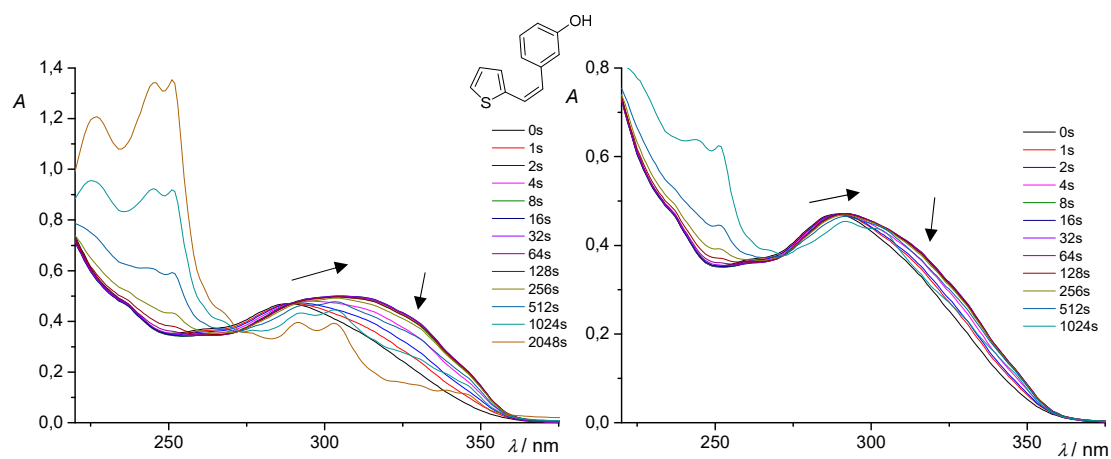

Figure S3. Compound *cis-2*: 300 nm (left); 350 nm (right).

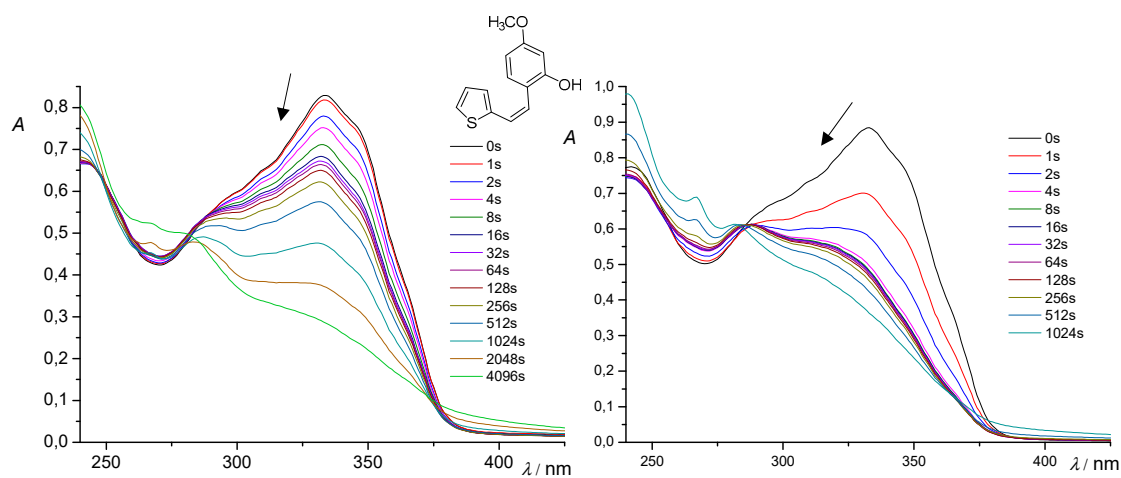

Figure S4. Compound *cis-3*: 300 nm (left); 350 nm (right).



---

**4. Chromatograms for data in Table 8 - Most successful photochemical reactions of the starting compounds 1-5 using performed in a flow reactor (followed by HPLC at 320 nm).**

Chromatogram for compound **1** and flow reactor ( $\tau = 2'$ ) using LED lamp of 365 nm without photocatalyst:

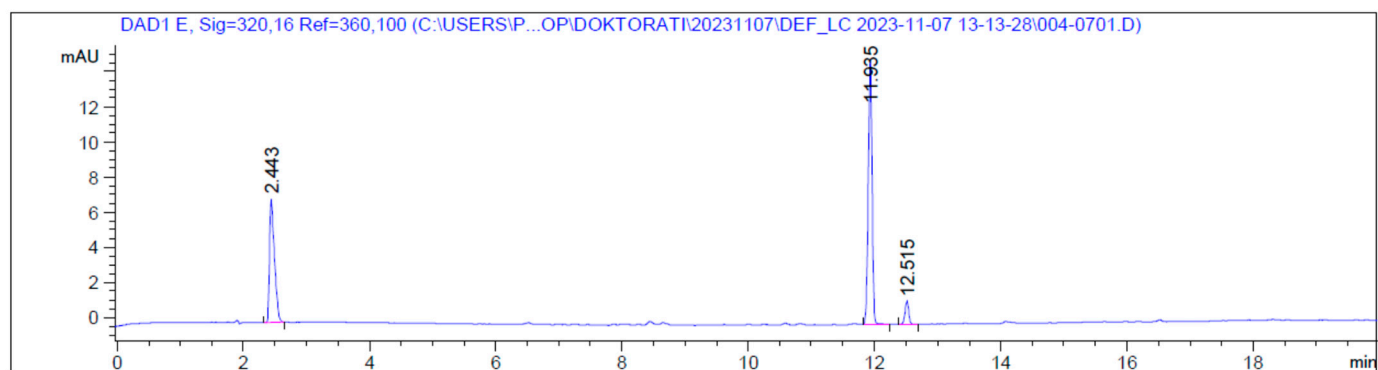

Chromatogram for compound **2** and flow reactor ( $\tau = 2'$ ) using LED lamp of 365 nm without photocatalyst:

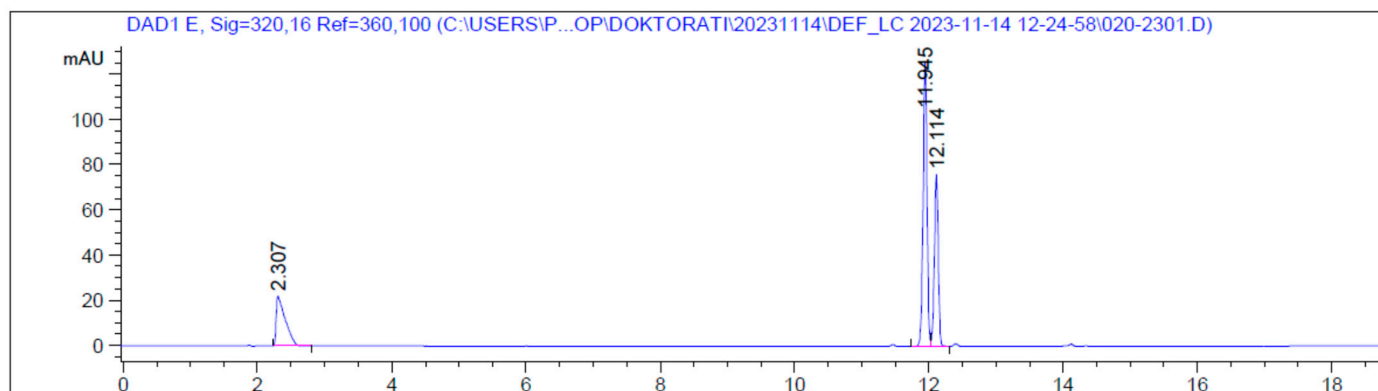

Chromatogram for compound **3** and flow reactor ( $\tau = 2'$ ) using LED lamp of 365 nm without photocatalyst:

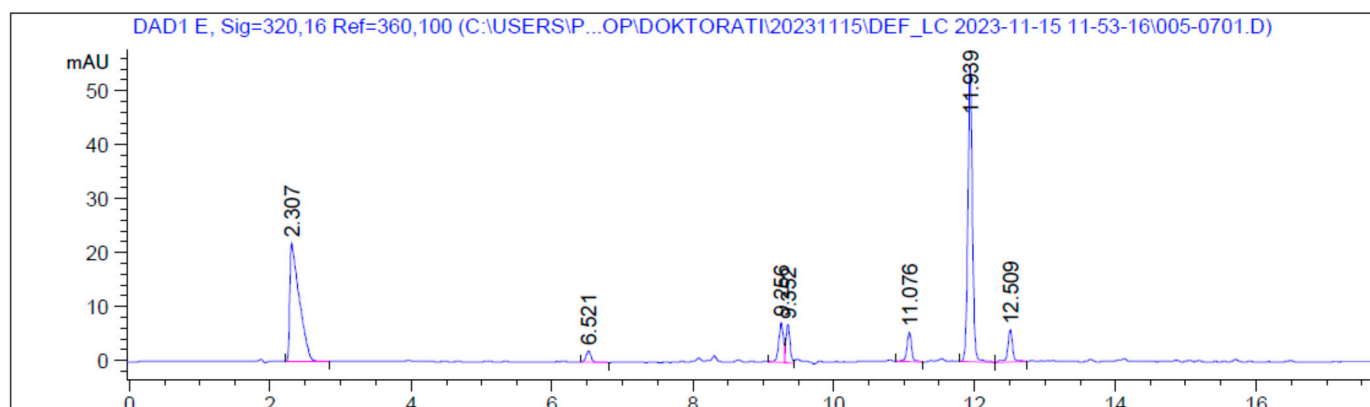

Chromatogram for compound **4** and flow reactor ( $\tau = 2'$ ) using LED lamp of 365 nm without photocatalyst:

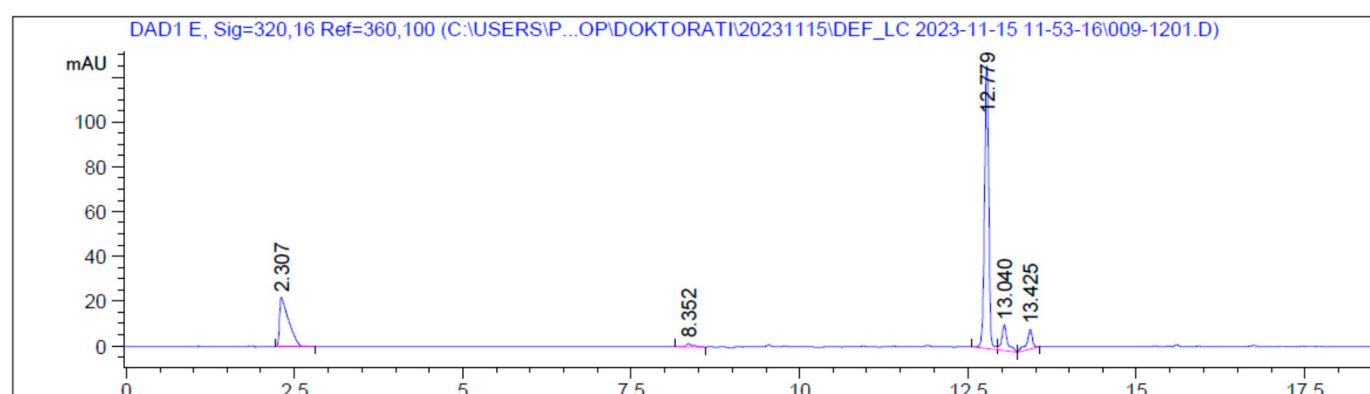

Chromatogram for compound **5** and flow reactor ( $\tau = 2'$ ) using LED lamp of 365 nm without photocatalyst:

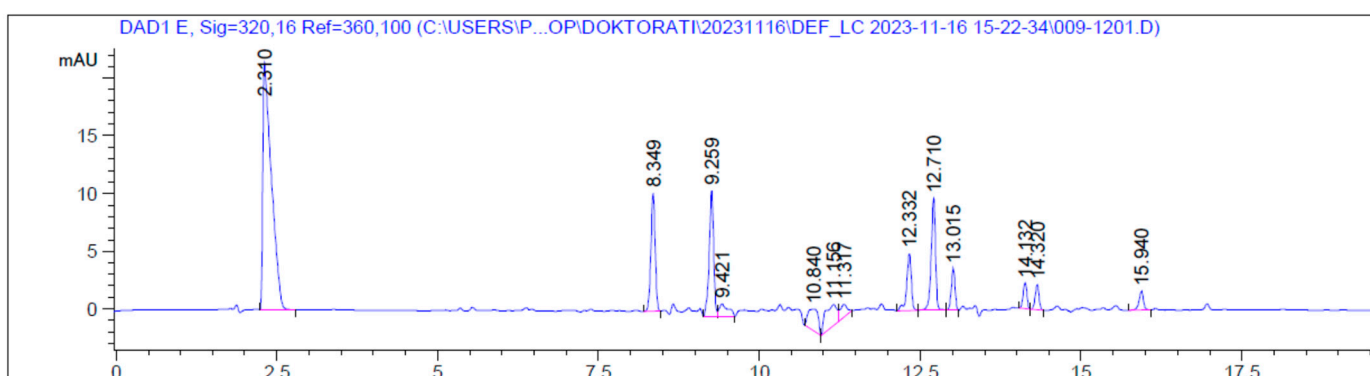

Chromatogram for compound **1** and flow reactor ( $\tau = 10'$ ) using LED lamp of 420 nm with photocatalyst free-base anionic porphyrin:

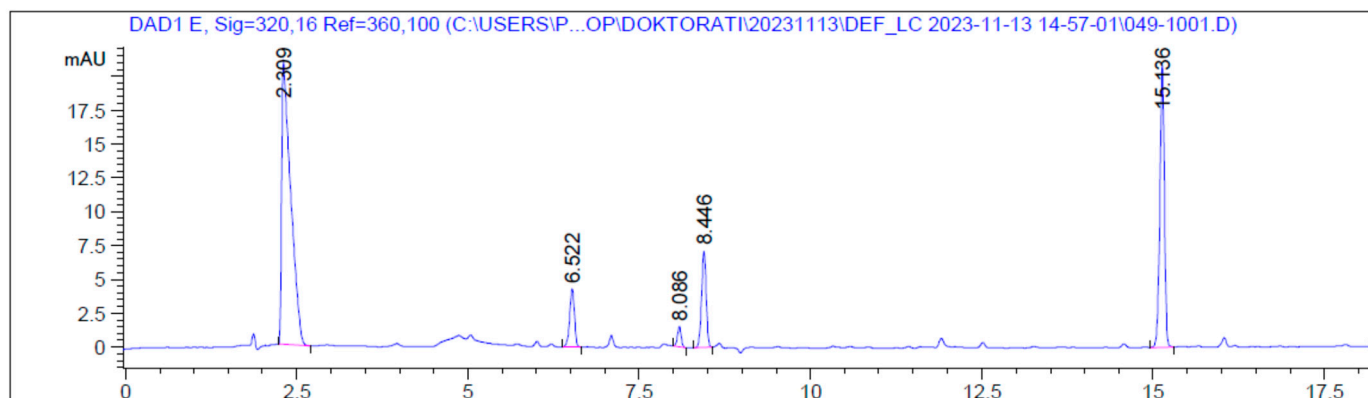

Chromatogram for compound **2** and flow reactor ( $\tau = 10'$ ) using LED lamp of 420 nm with photocatalyst free-base anionic porphyrin:

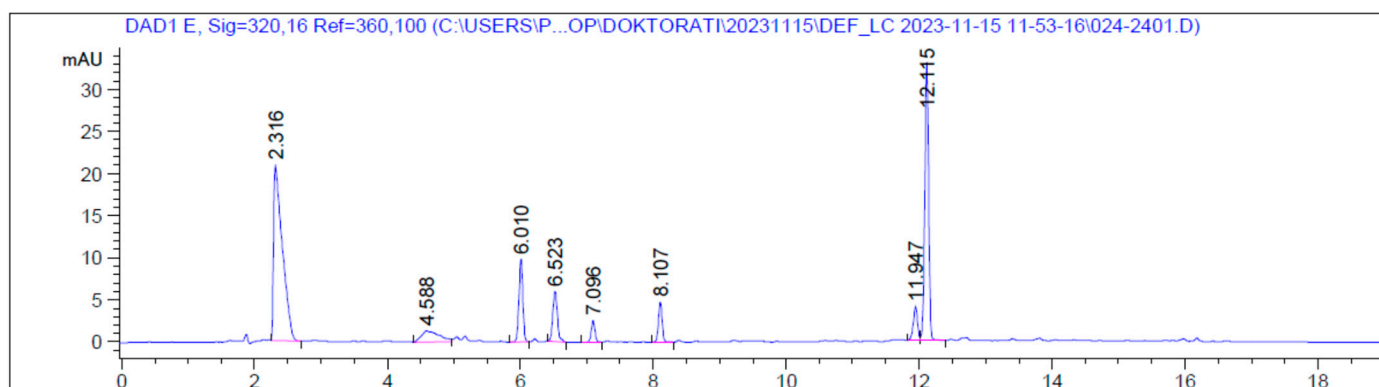

Chromatogram for compound **3** and flow reactor ( $\tau = 10'$ ) using LED lamp of 420 nm with photocatalyst free-base anionic porphyrin:

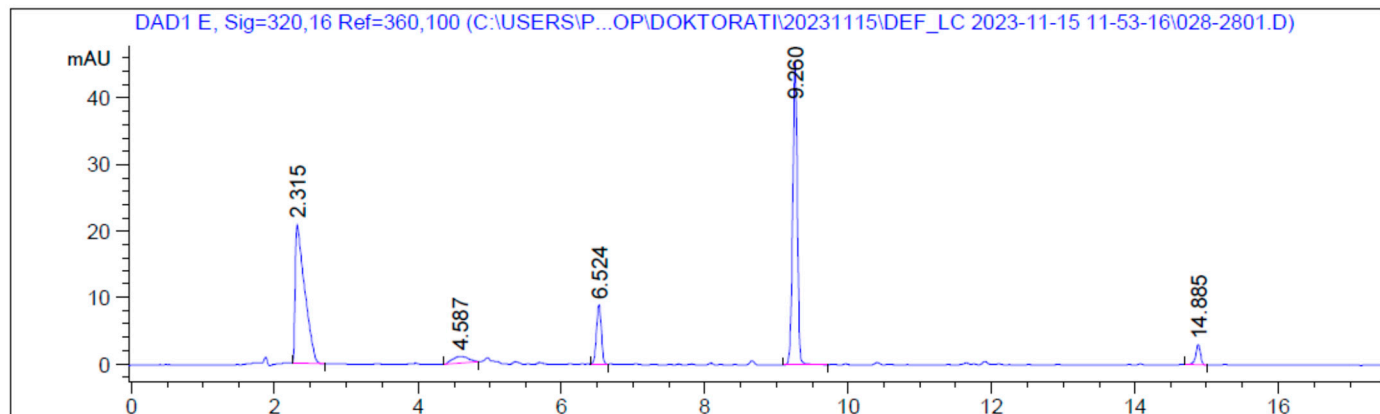

Chromatogram for compound **4** and flow reactor ( $\tau = 10'$ ) using LED lamp of 420 nm with photocatalyst free-base anionic porphyrin:

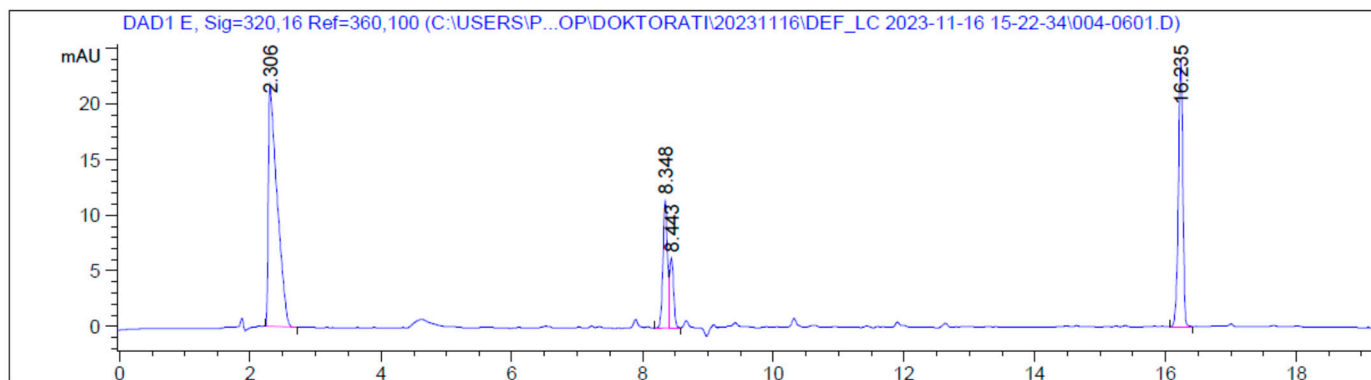

Chromatogram for compound **5** and flow reactor ( $\tau = 10'$ ) using LED lamp of 420 nm with photocatalyst free-base anionic porphyrin:

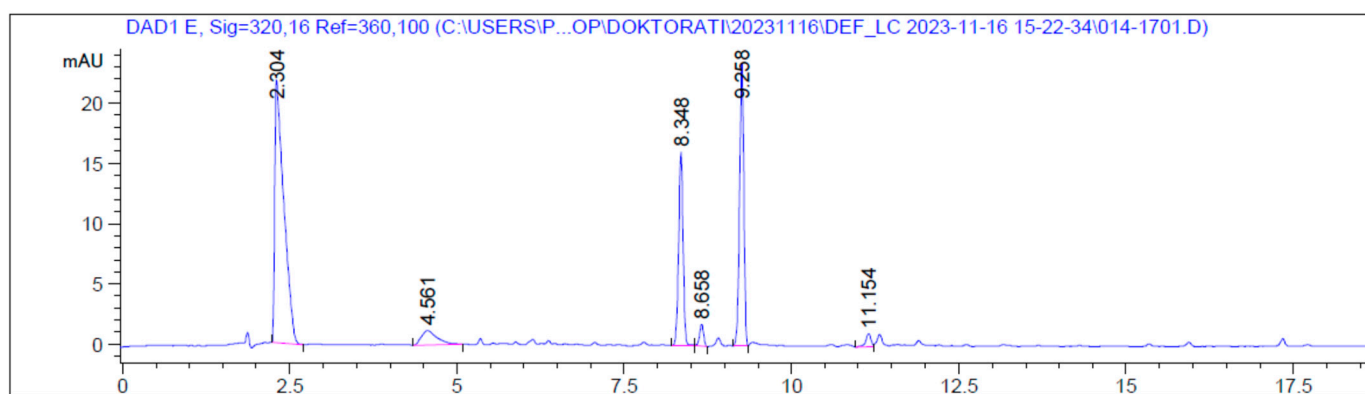

## 5. NMR spectra of starting compounds, photoproducts and photomixtures

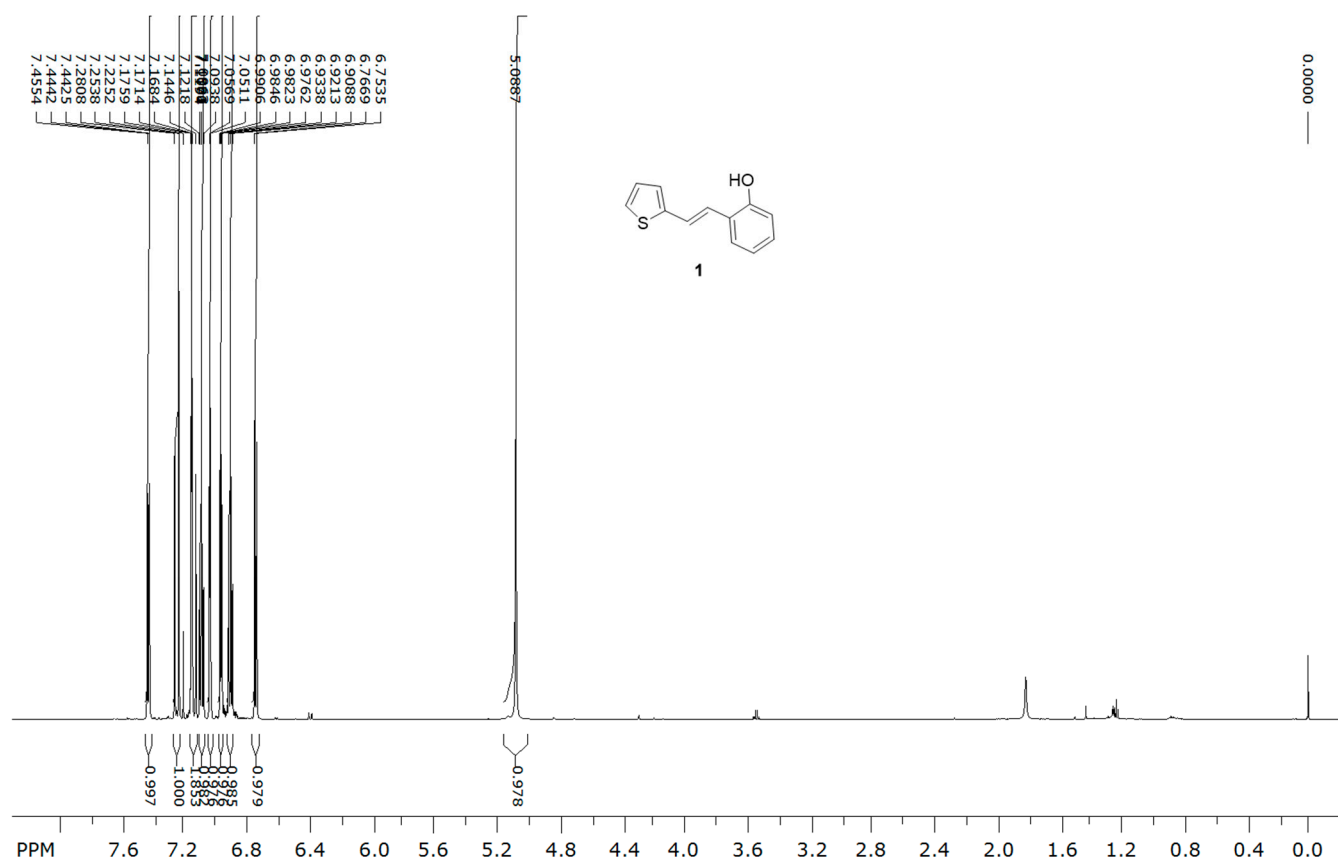

Figure S5. <sup>1</sup>H NMR (CDCl<sub>3</sub>) spectrum of **1**.

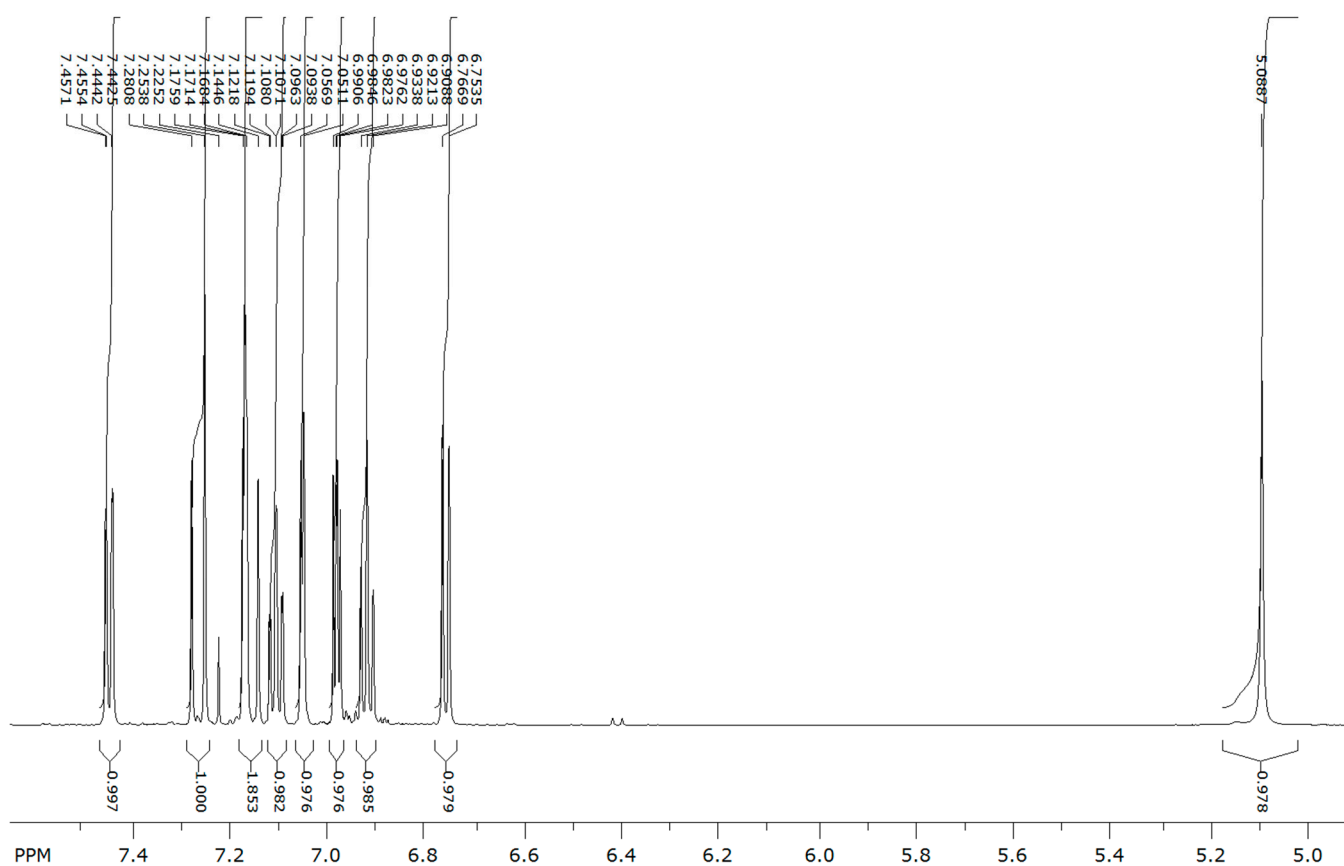

Figure S6. <sup>1</sup>H NMR (CDCl<sub>3</sub>) spectrum of aromatic part of **1**.



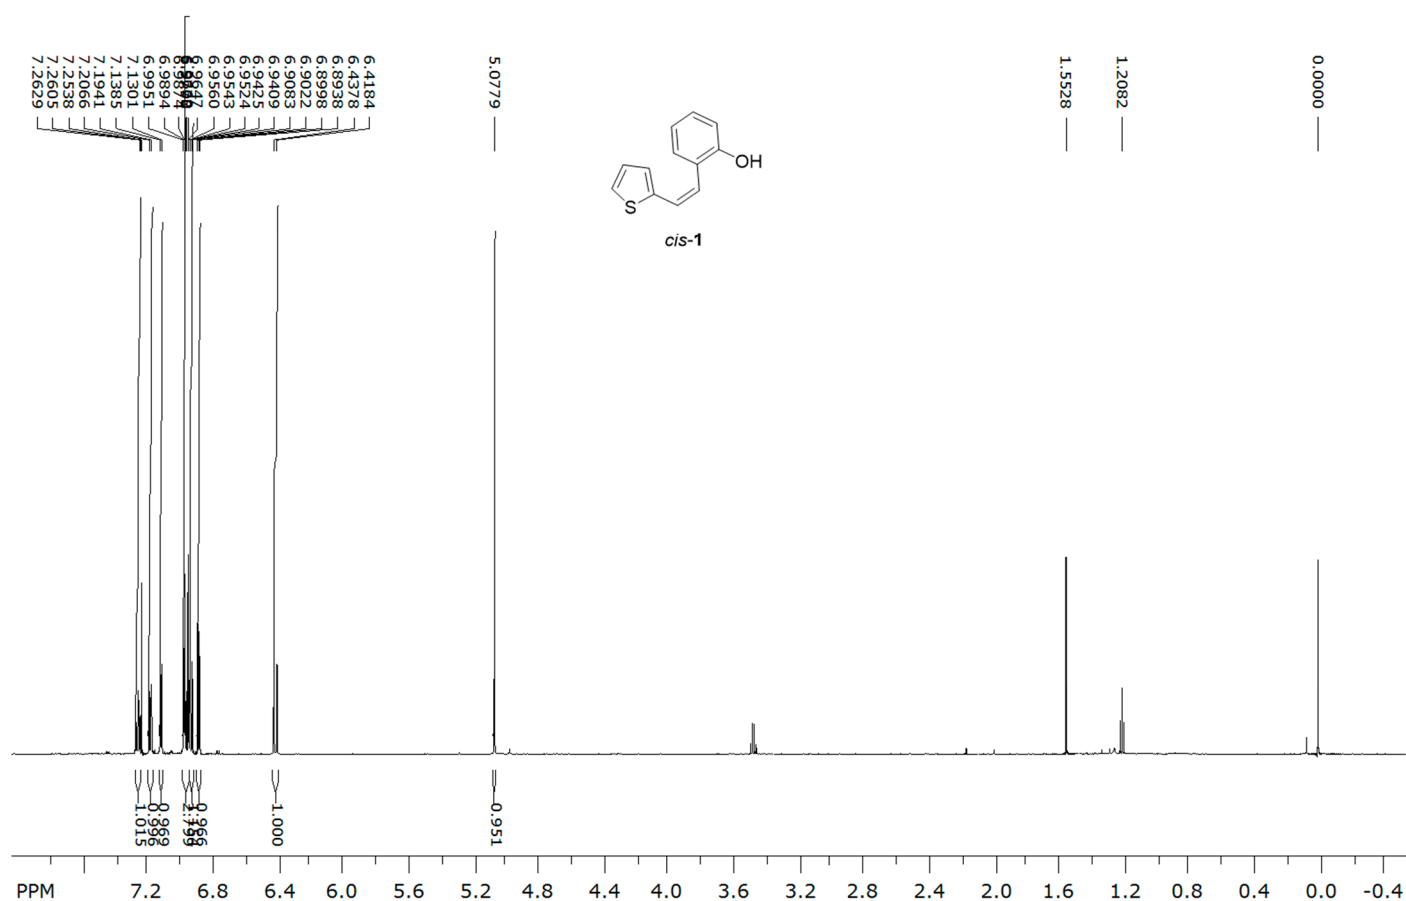

Figure S7.  $^1\text{H}$  NMR ( $\text{CDCl}_3$ ) spectrum of *cis-1*.

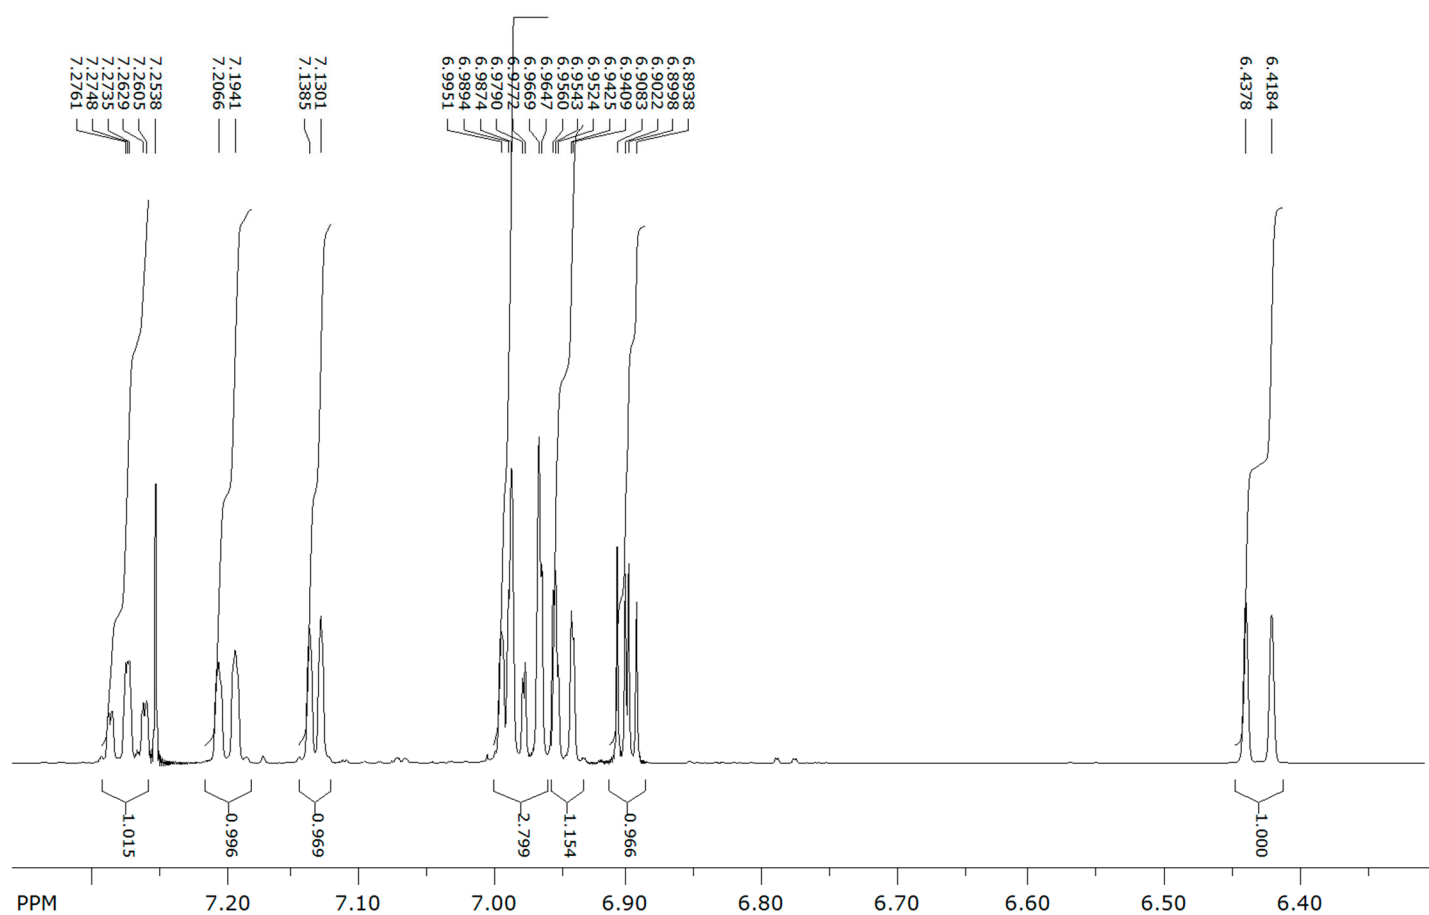

**Figure S8.** <sup>1</sup>H NMR (CDCl<sub>3</sub>) spectrum of aromatic part of *cis*-1.

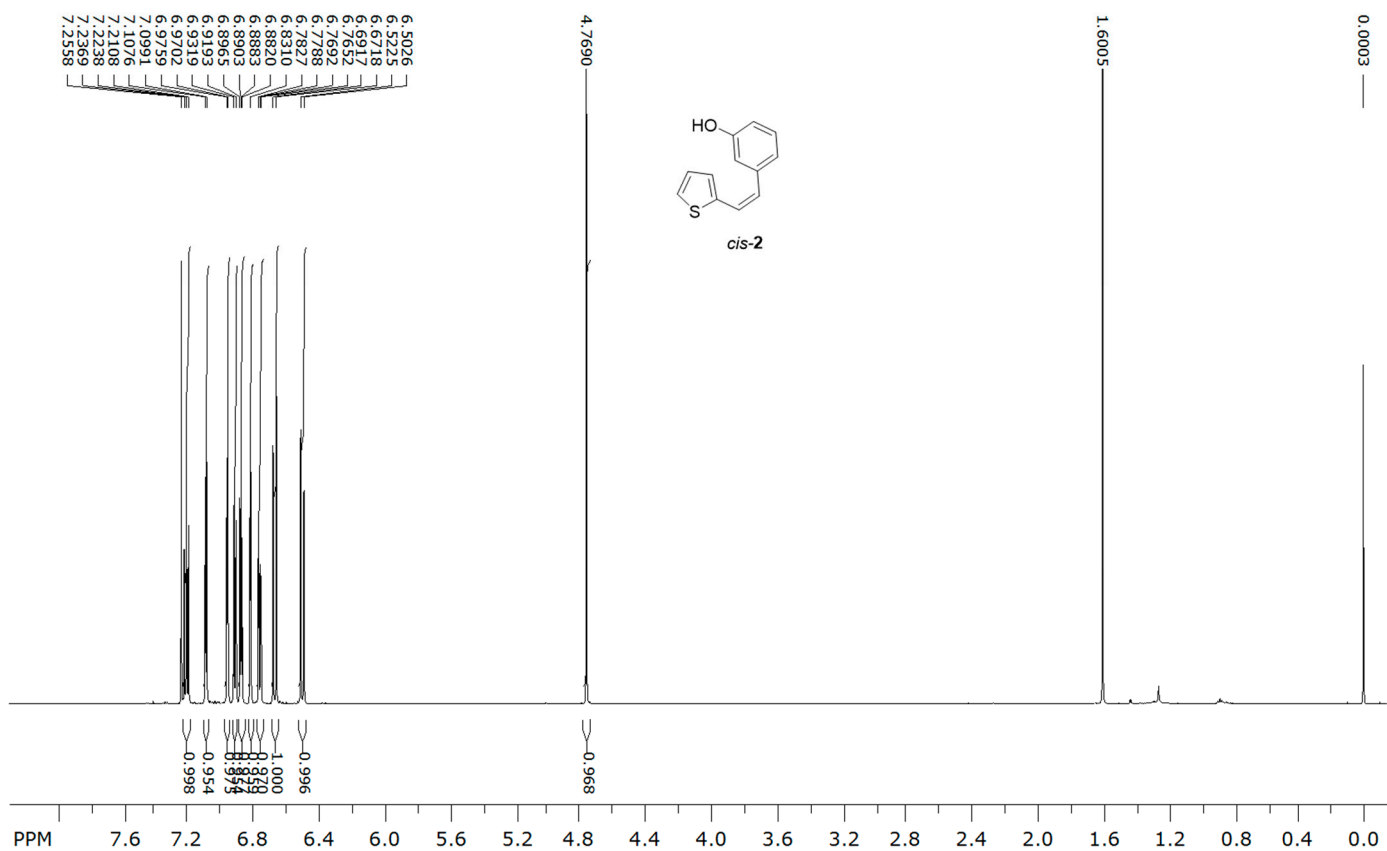

Figure S9. <sup>1</sup>H NMR (CDCl<sub>3</sub>) spectrum of *cis-2*.



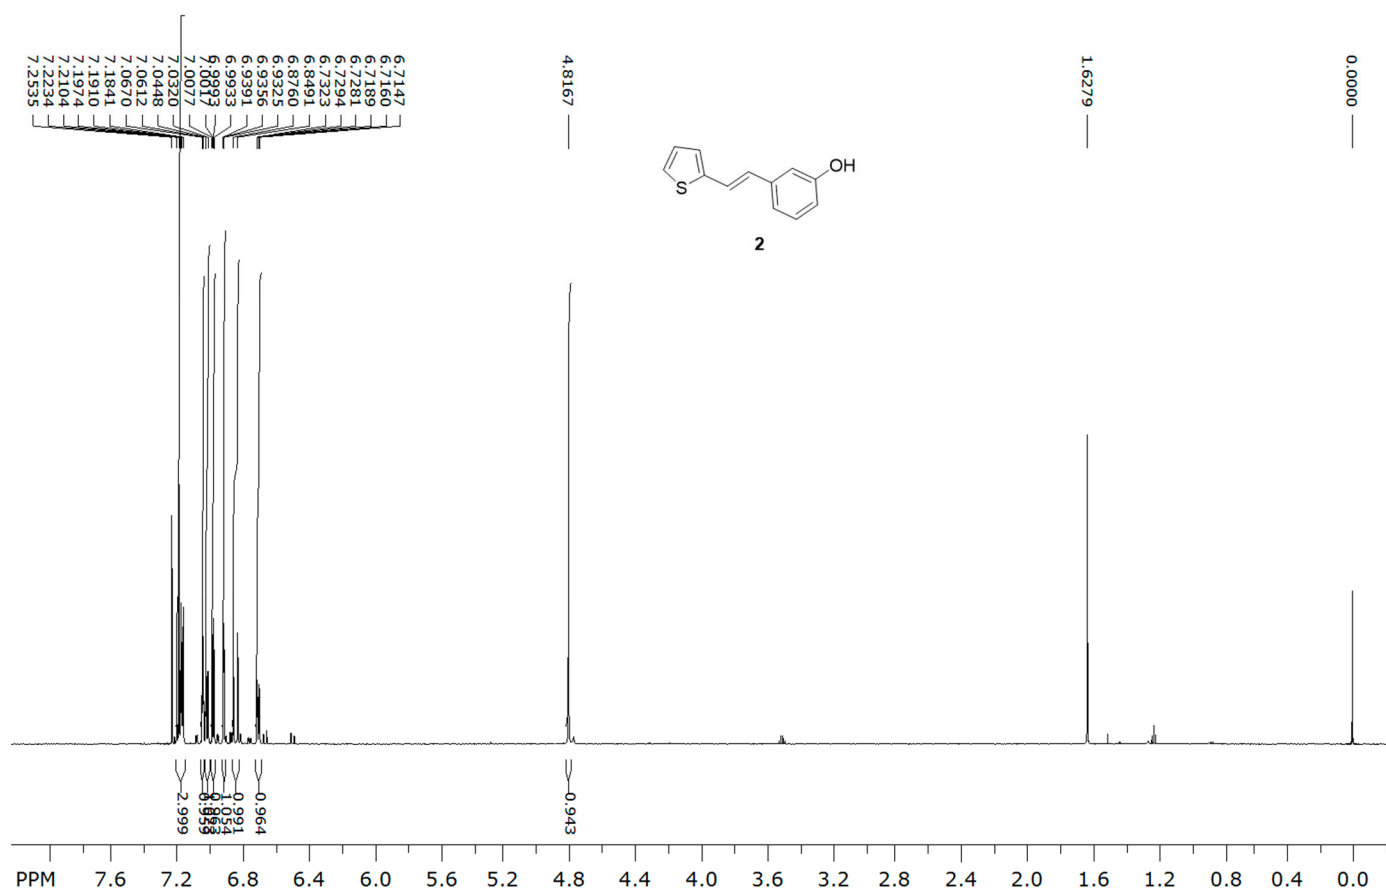

**Figure S11.** <sup>1</sup>H NMR (CDCl<sub>3</sub>) spectrum of **2**.

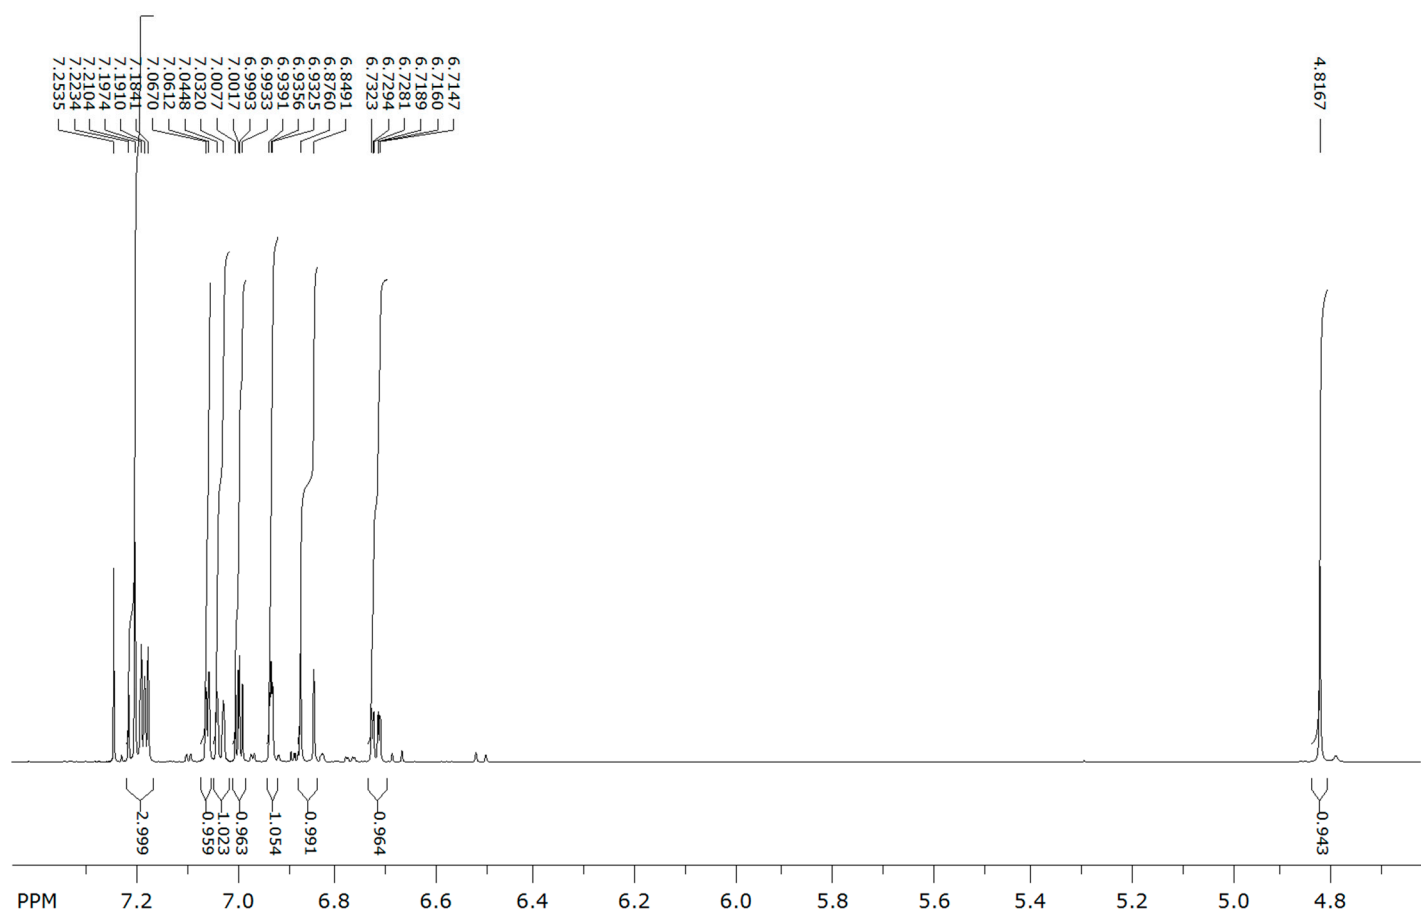

**Figure S12.** <sup>1</sup>H NMR (CDCl<sub>3</sub>) spectrum of aromatic part of **2**.

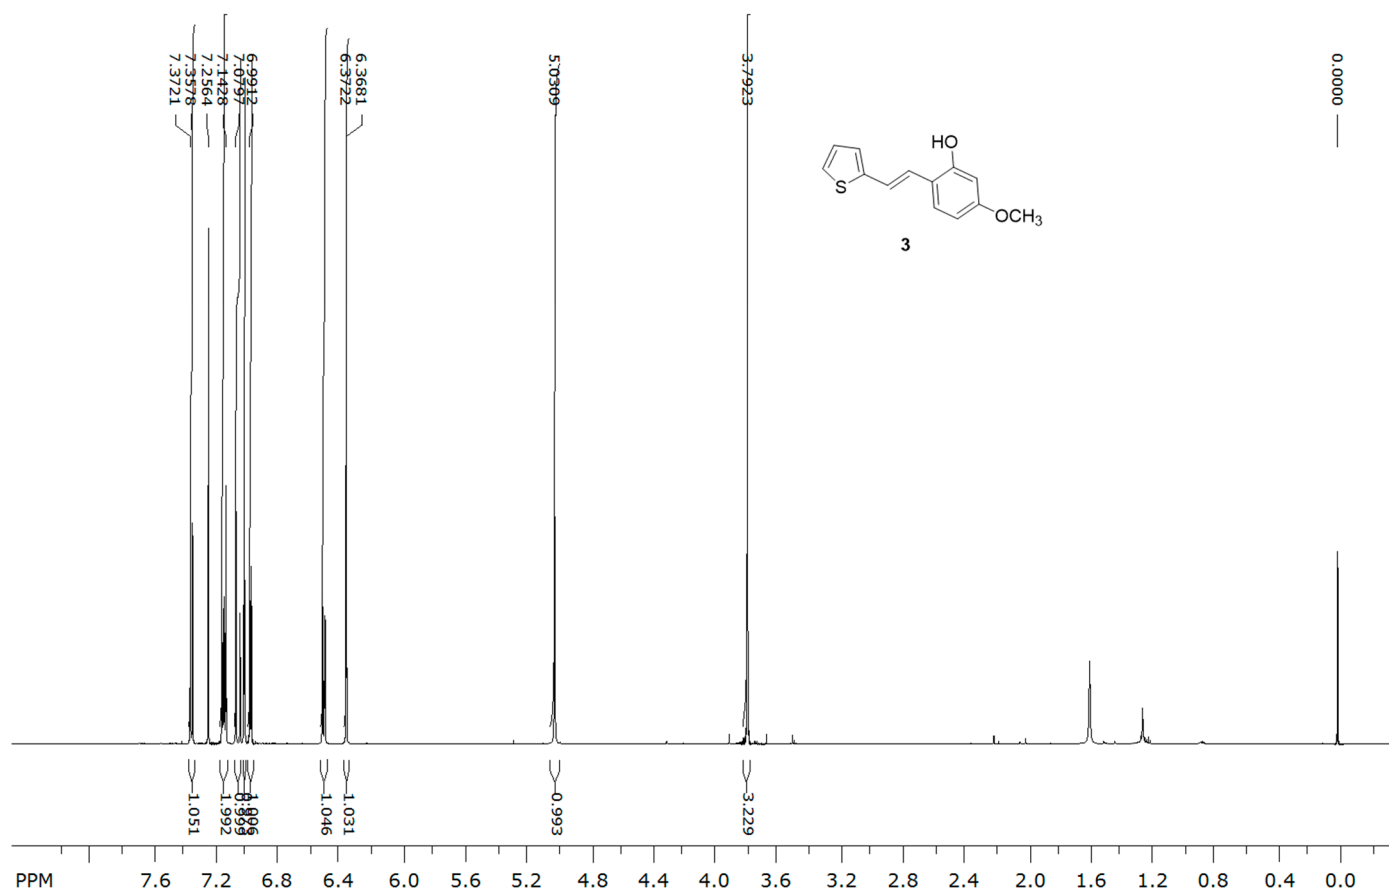

**Figure S13.** <sup>1</sup>H NMR (CDCl<sub>3</sub>) spectrum of **3**.

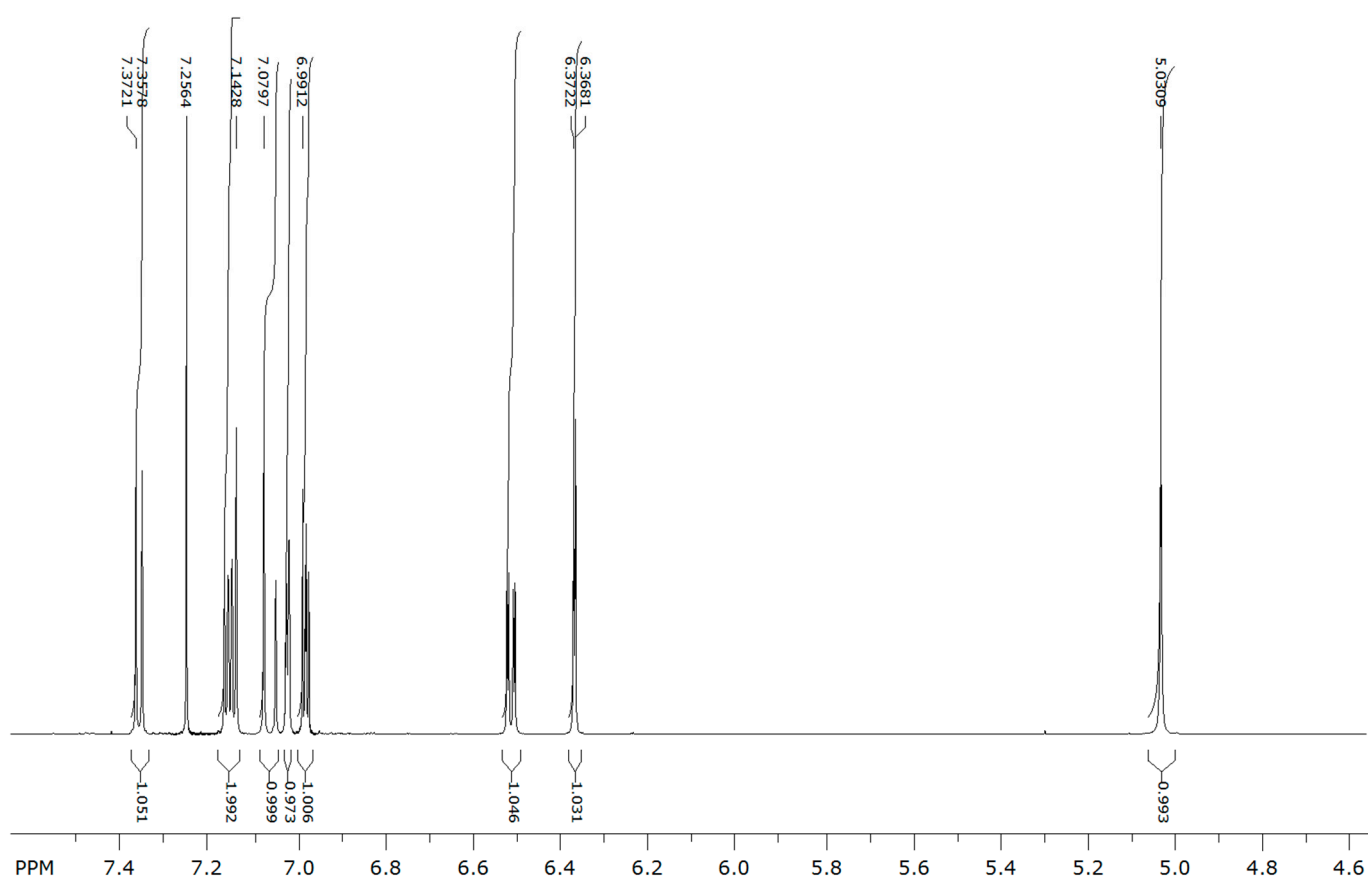

**Figure S14.** <sup>1</sup>H NMR (CDCl<sub>3</sub>) spectrum of aromatic part of 3.



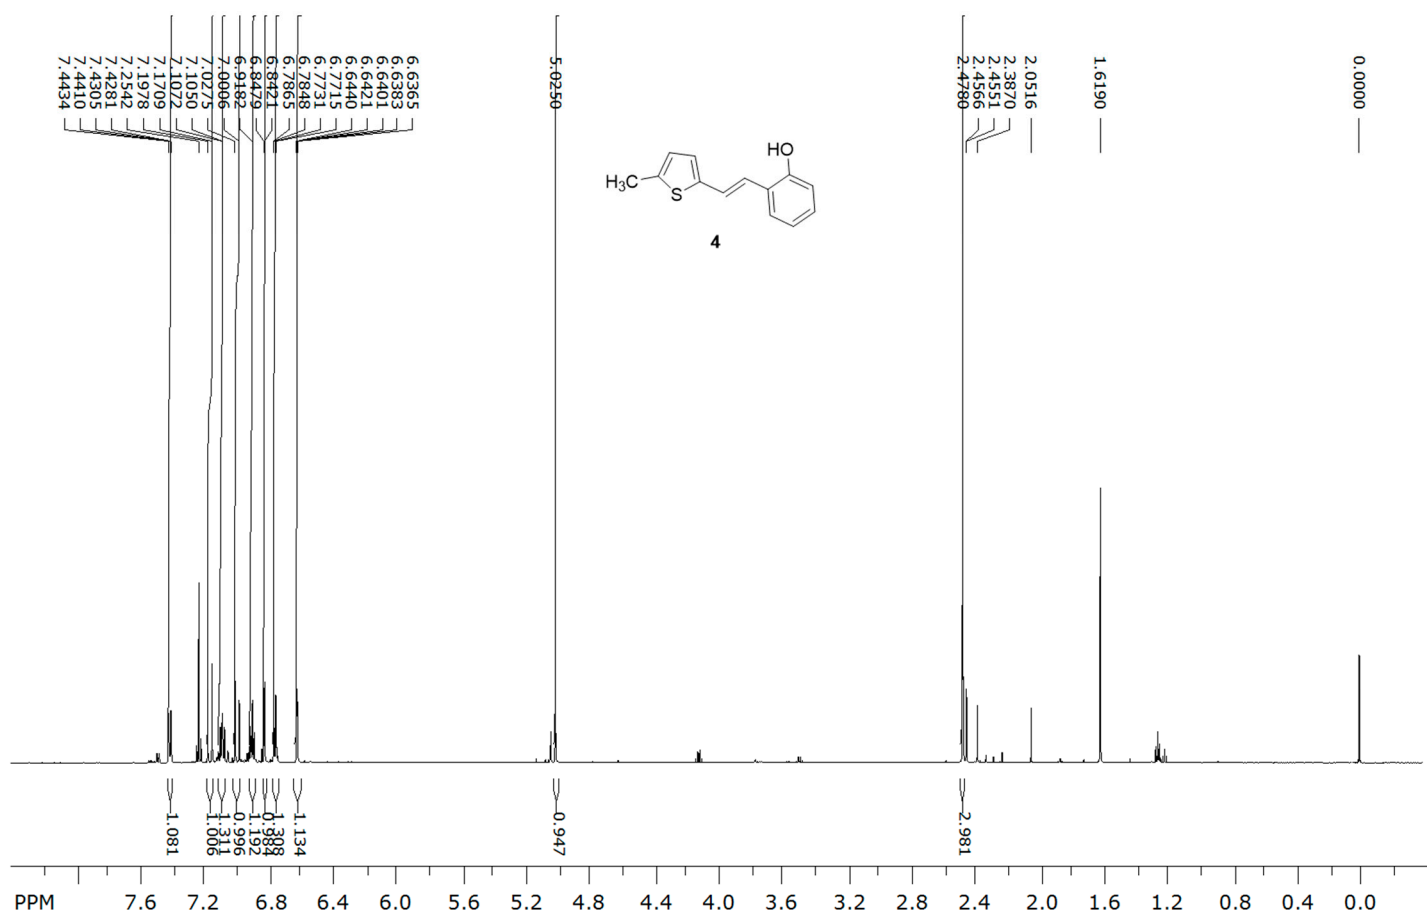

Figure S15. <sup>1</sup>H NMR (CDCl<sub>3</sub>) spectrum of **4**.

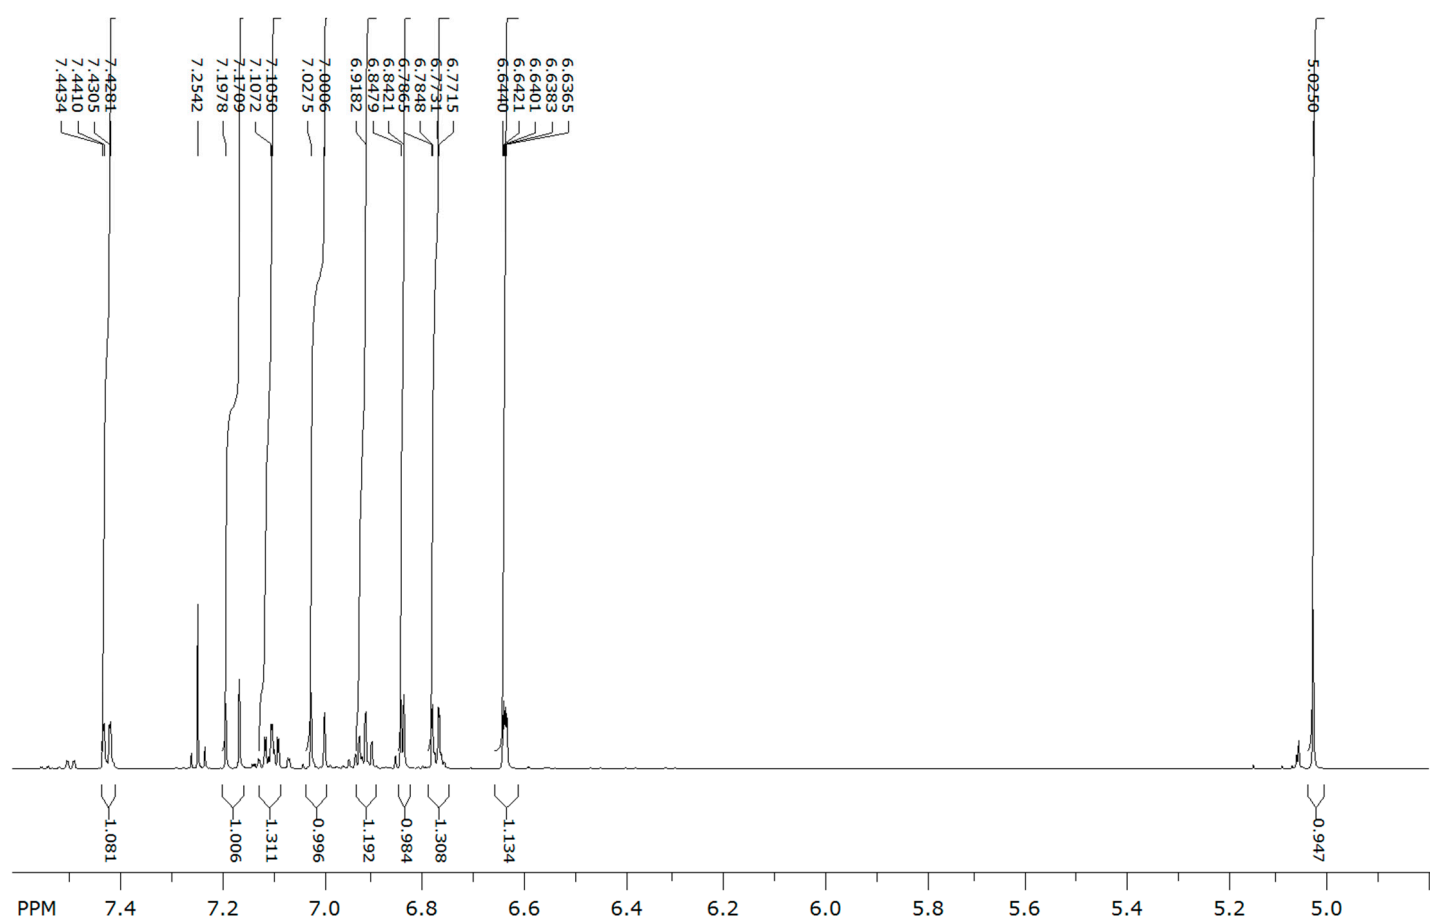

**Figure S16.** <sup>1</sup>H NMR (CDCl<sub>3</sub>) spectrum of aromatic part of 4.

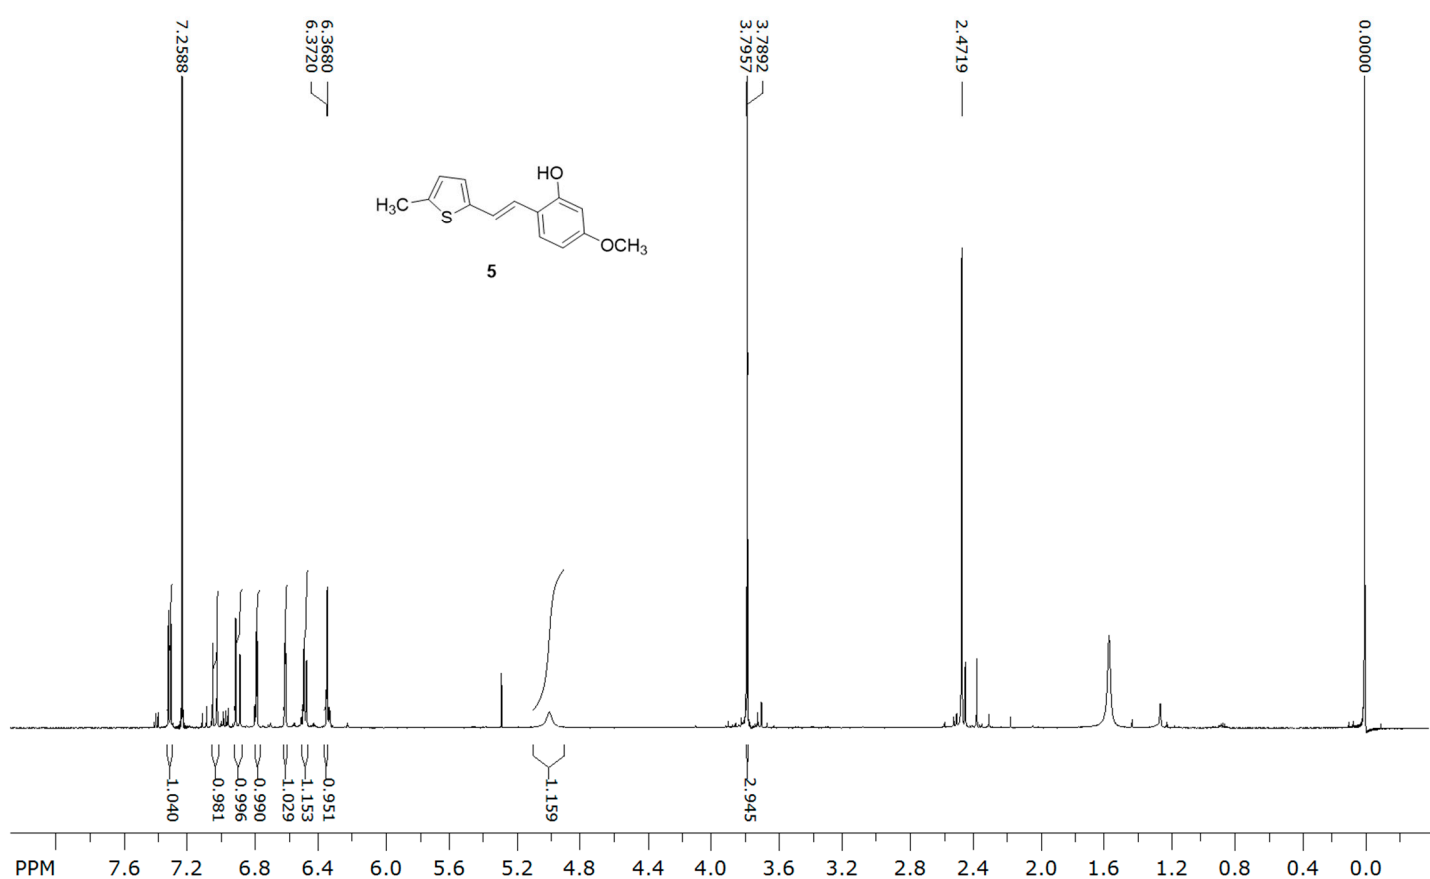

Figure S17. <sup>1</sup>H NMR (CDCl<sub>3</sub>) spectrum of 5.

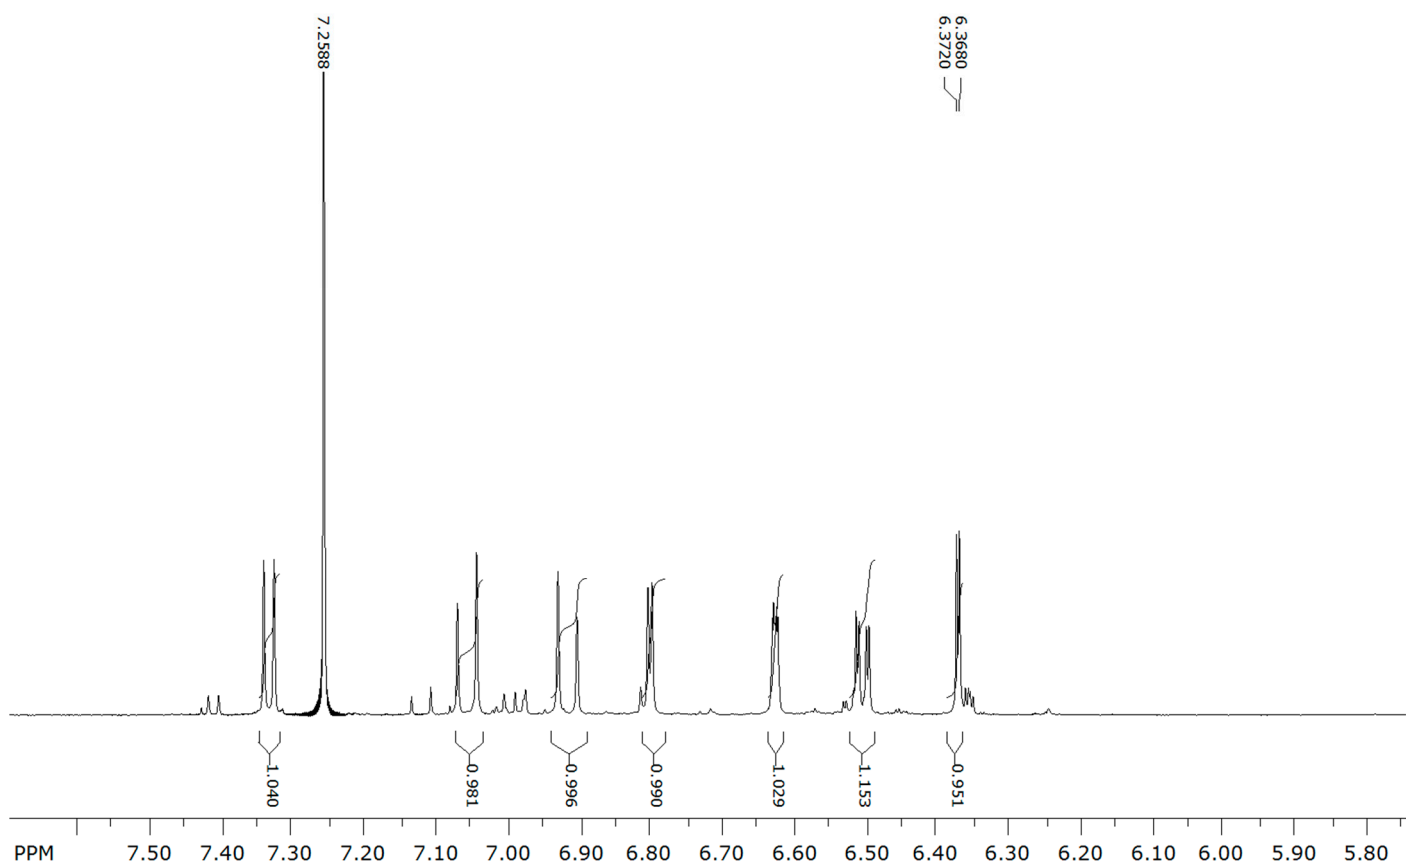

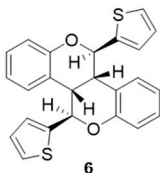

PPM    7.6    7.2    6.8    6.4    6.0    5.6    5.2    4.8    4.4    4.0    3.6    3.2    2.8    2.4    2.0    1.6    1.2    0.8    0.4    0.0

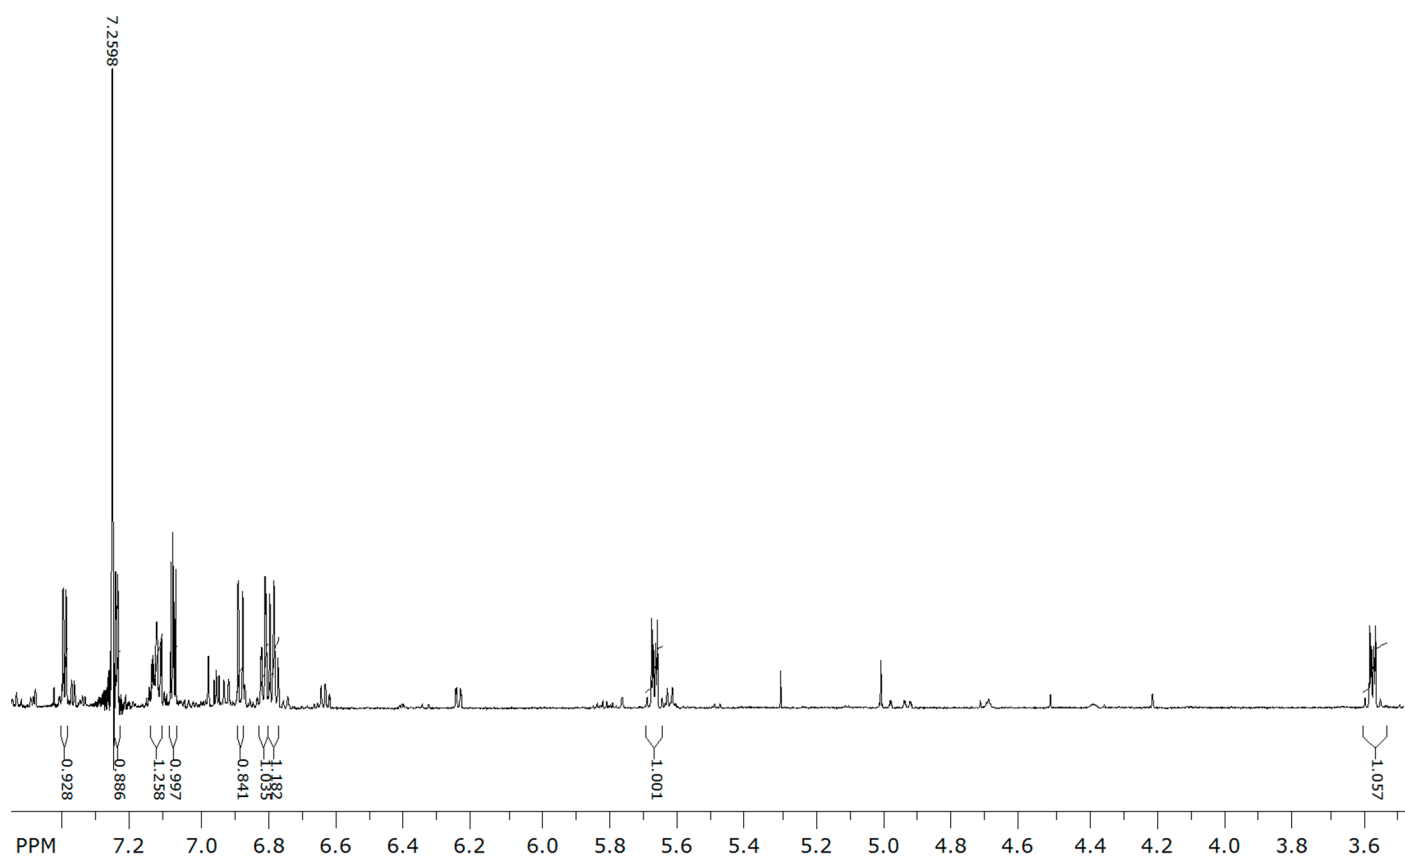

Figure S20.  $^1\text{H}$  NMR ( $\text{CDCl}_3$ ) spectrum of aromatic part of **6**.

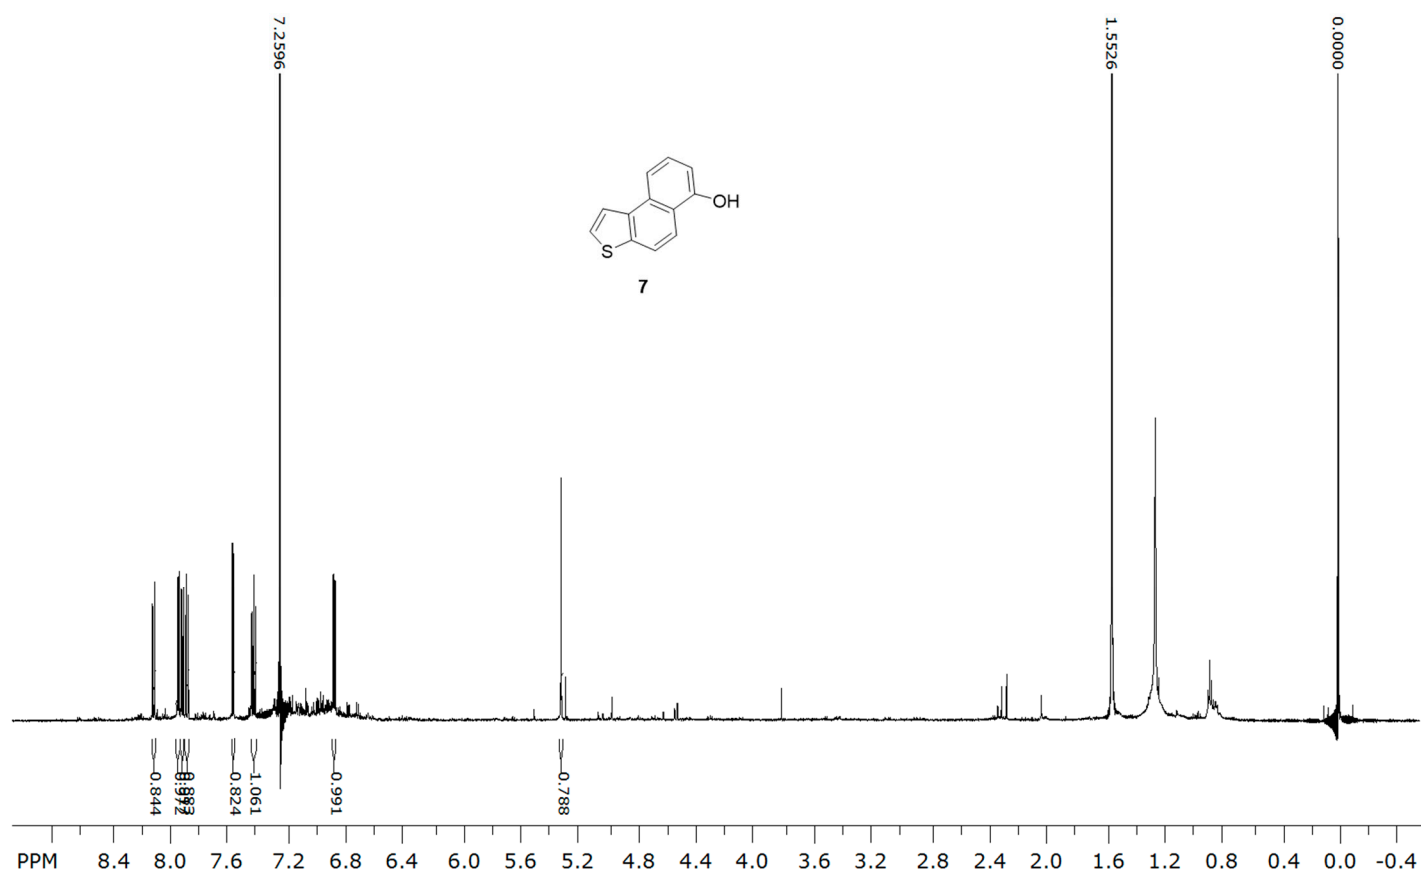

**Figure S21.**  $^1\text{H}$  NMR ( $\text{CDCl}_3$ ) spectrum of **7**.

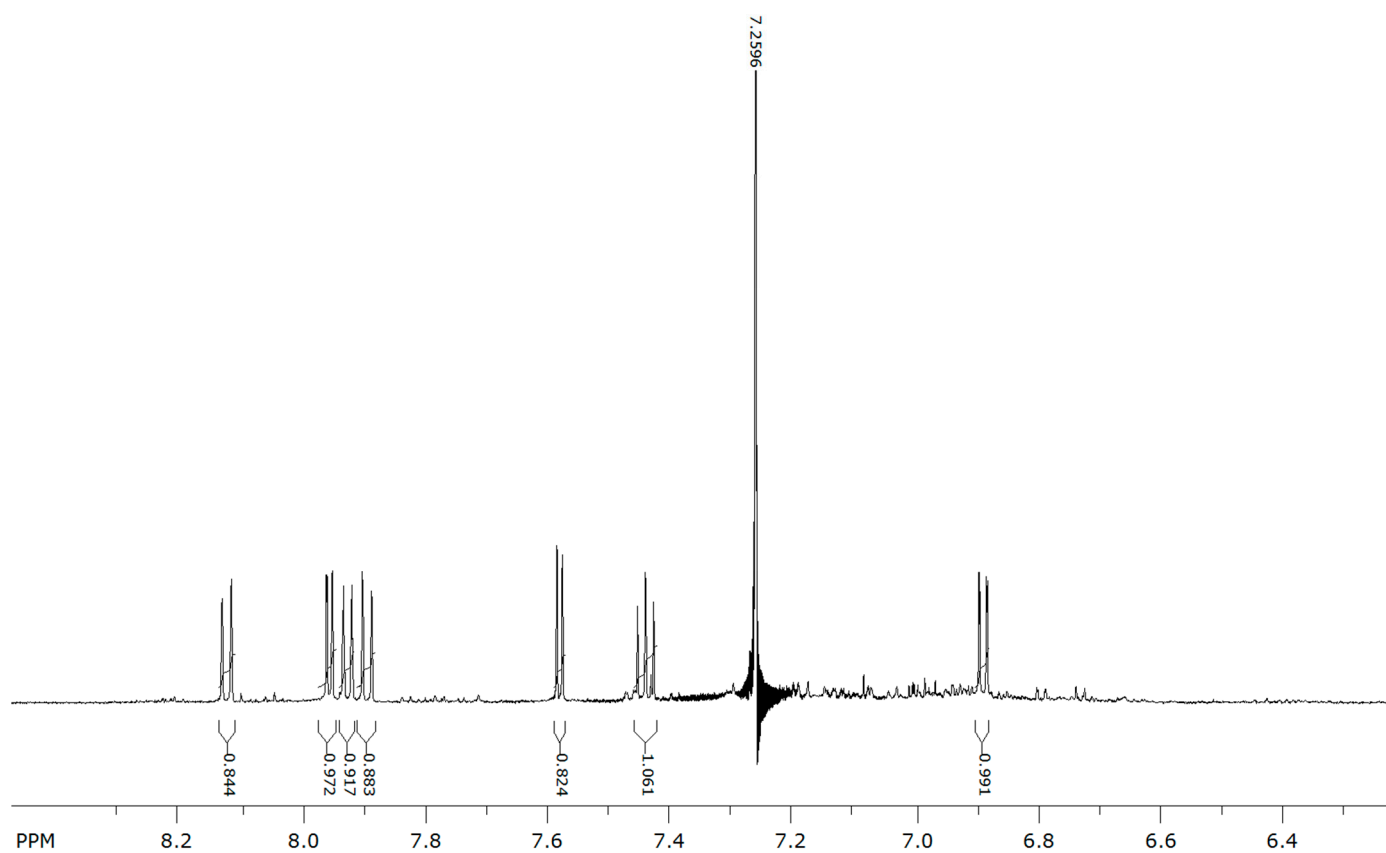

**Figure S22.**  $^1\text{H}$  NMR ( $\text{CDCl}_3$ ) spectrum of aromatic part of **7**.

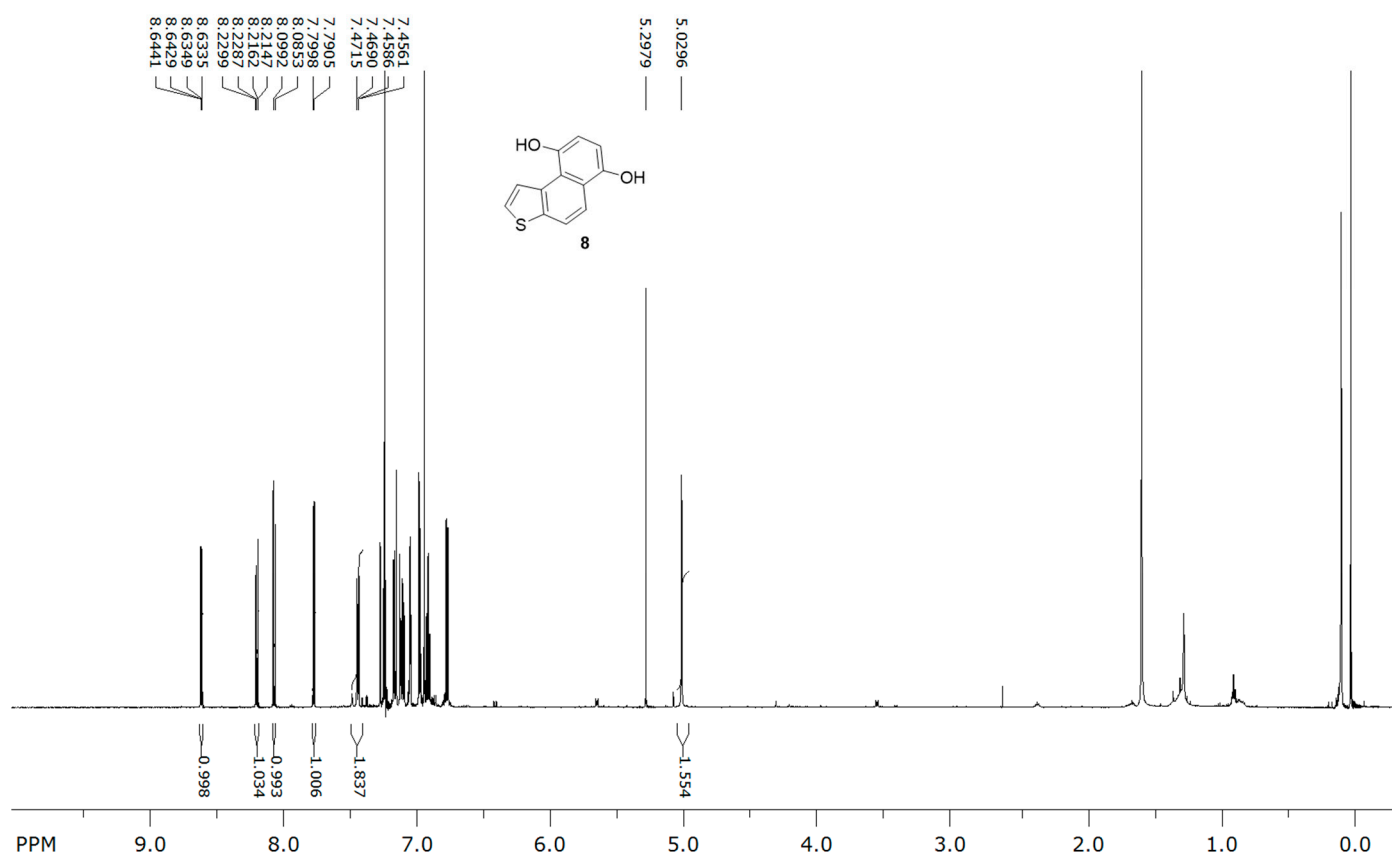

Figure S23. <sup>1</sup>H NMR (CDCl<sub>3</sub>) spectrum of **8**.

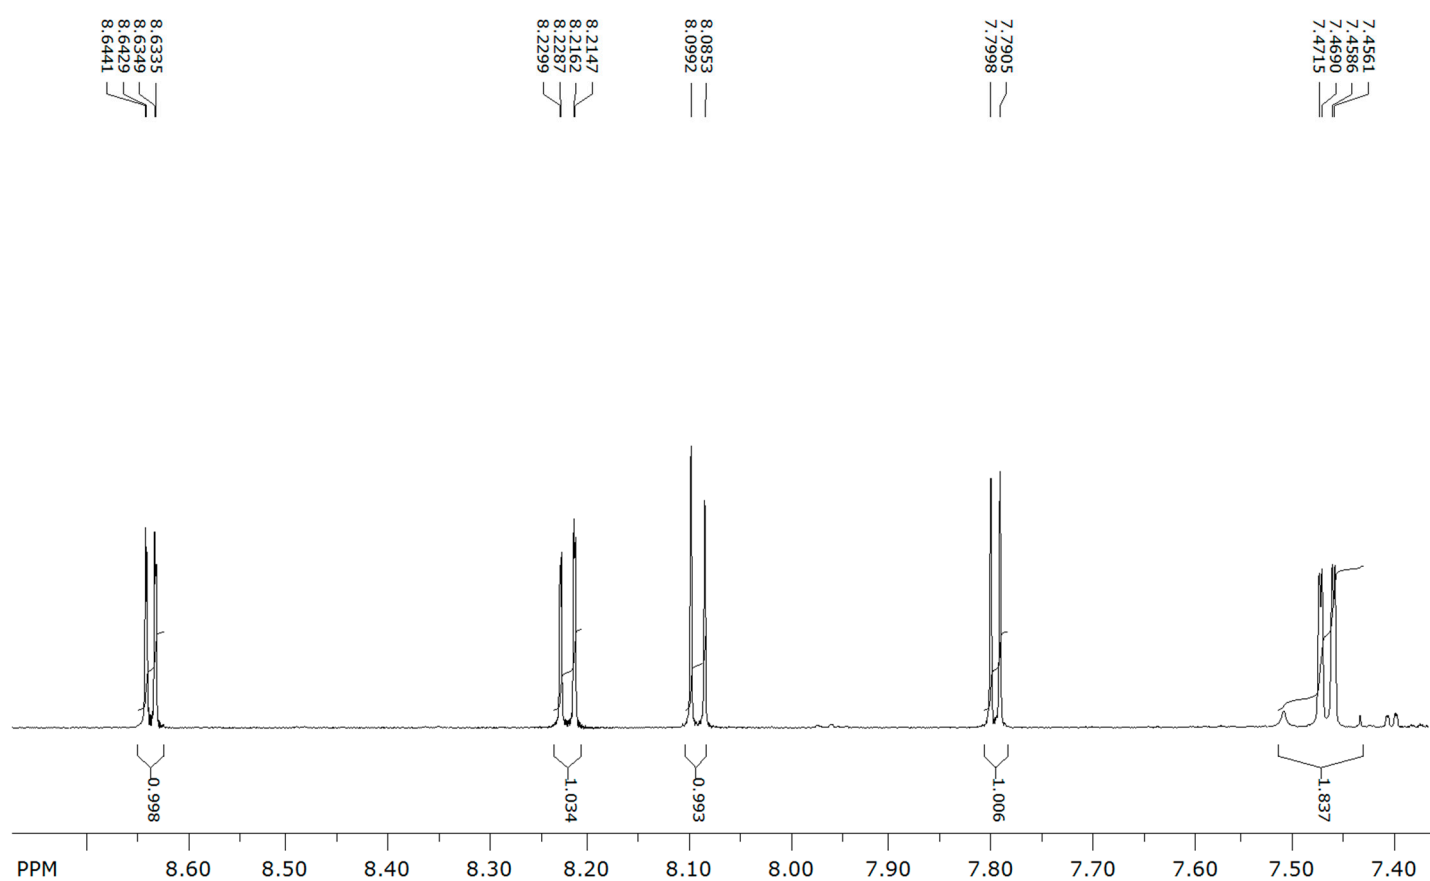

**Figure S24.** <sup>1</sup>H NMR (CDCl<sub>3</sub>) spectrum of aromatic part of 8.





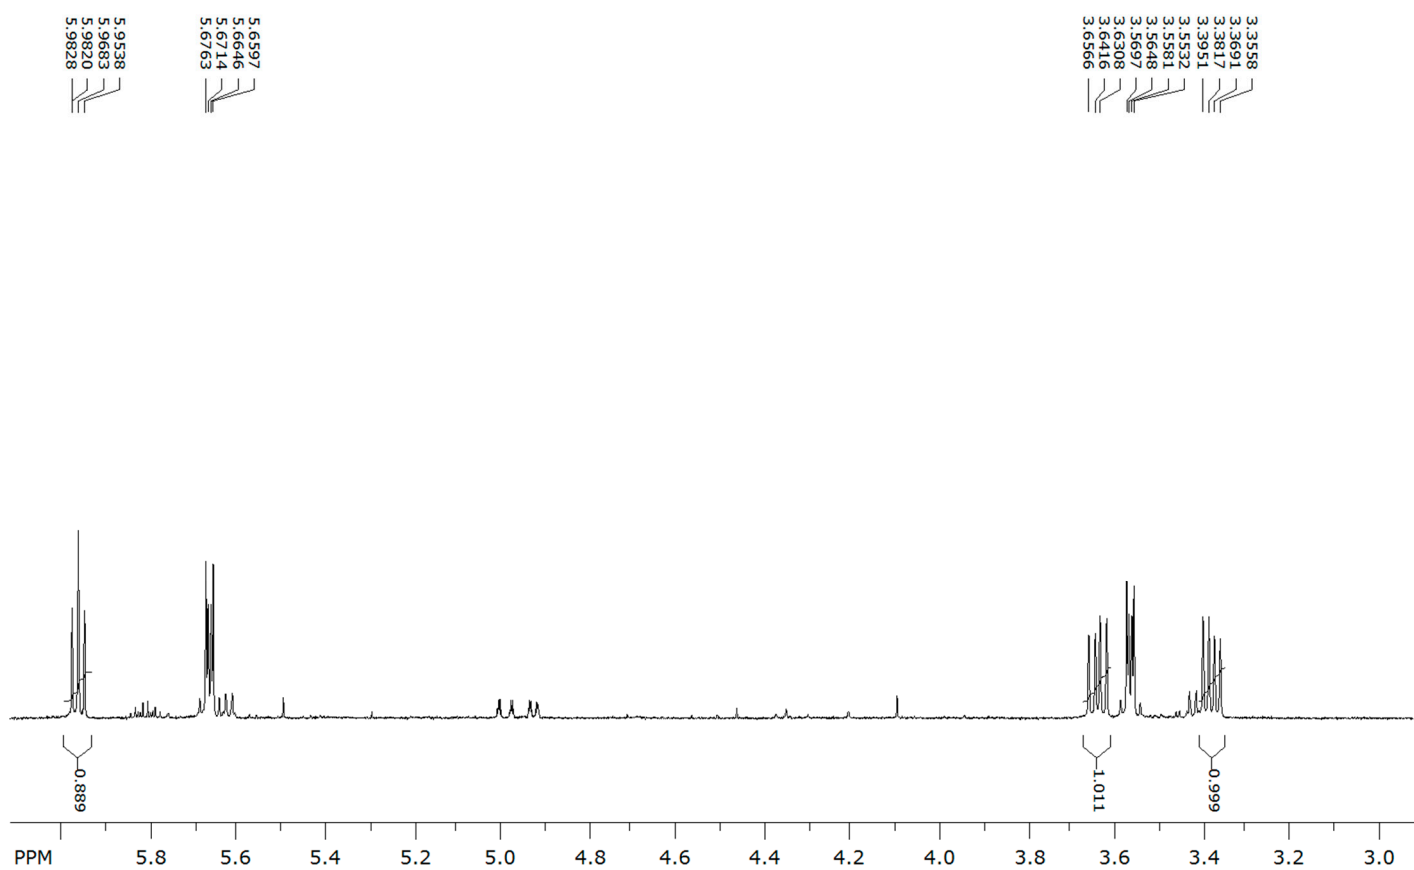

**Figure S26.** <sup>1</sup>H NMR (CDCl<sub>3</sub>) spectrum of aromatic part of **9**.

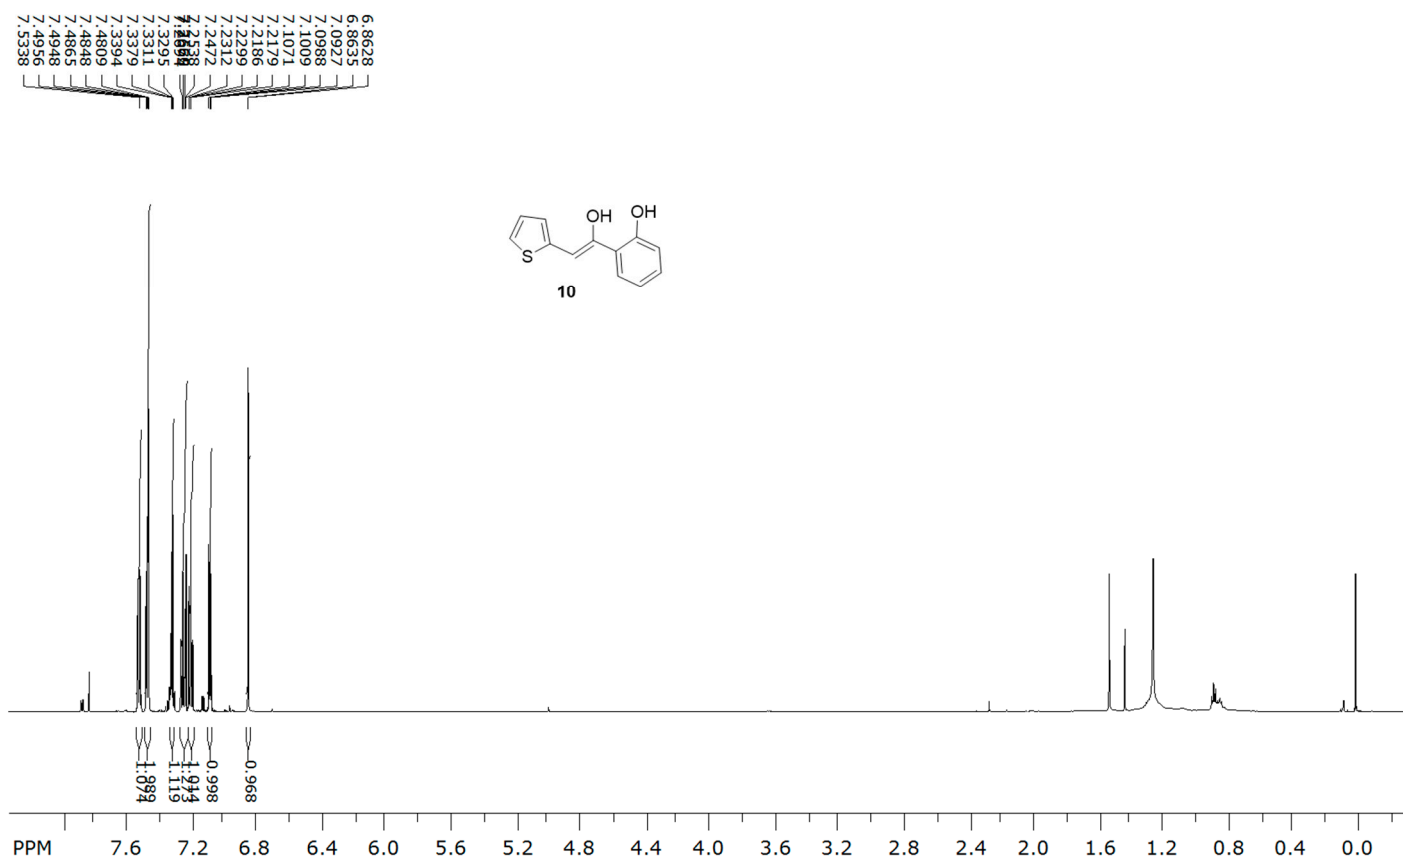

Figure S27. <sup>1</sup>H NMR (CDCl<sub>3</sub>) spectrum of **10**.

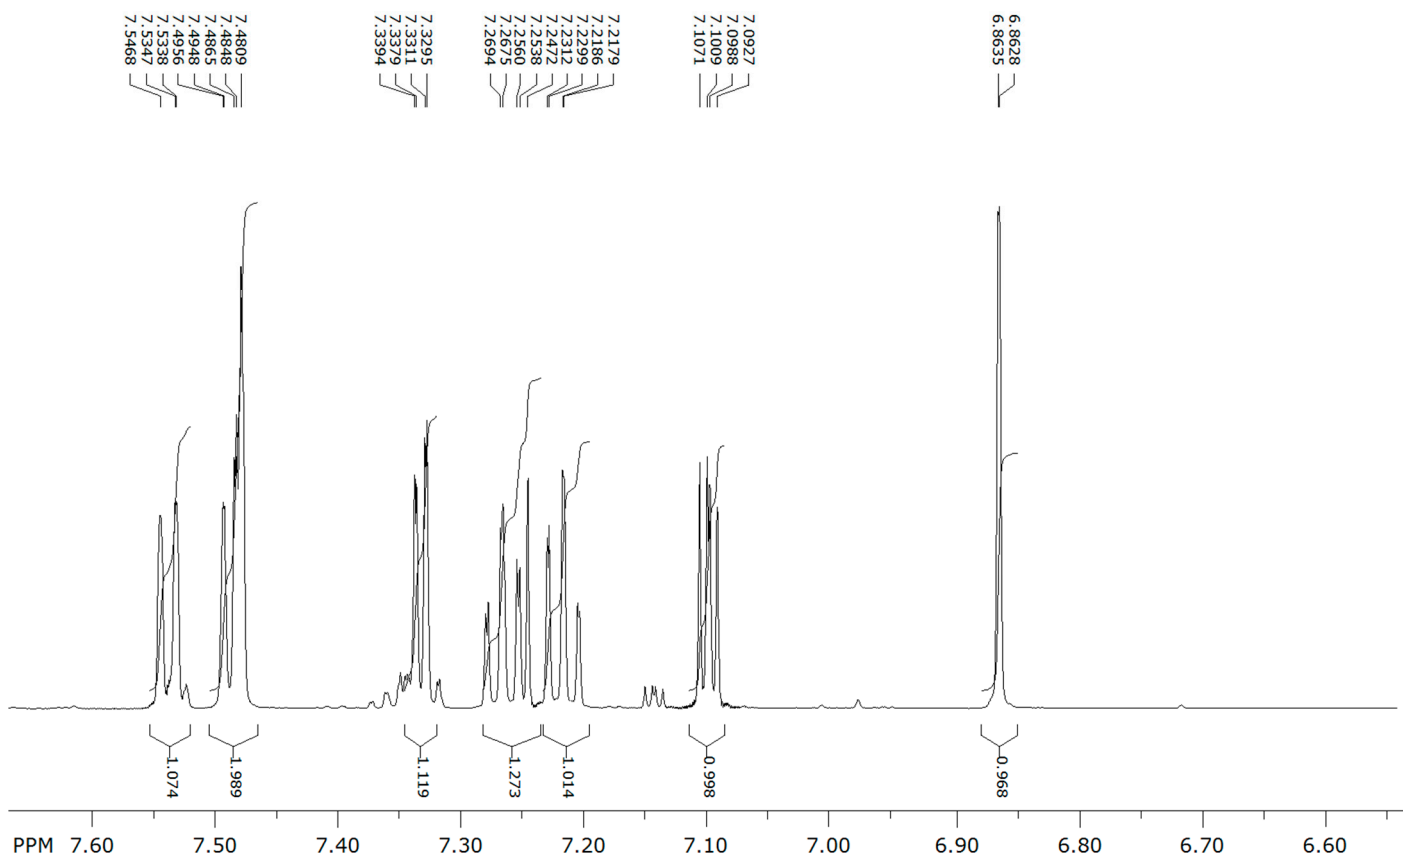

**Figure S28.**  $^1\text{H}$  NMR ( $\text{CDCl}_3$ ) spectrum of aromatic part of **10**.

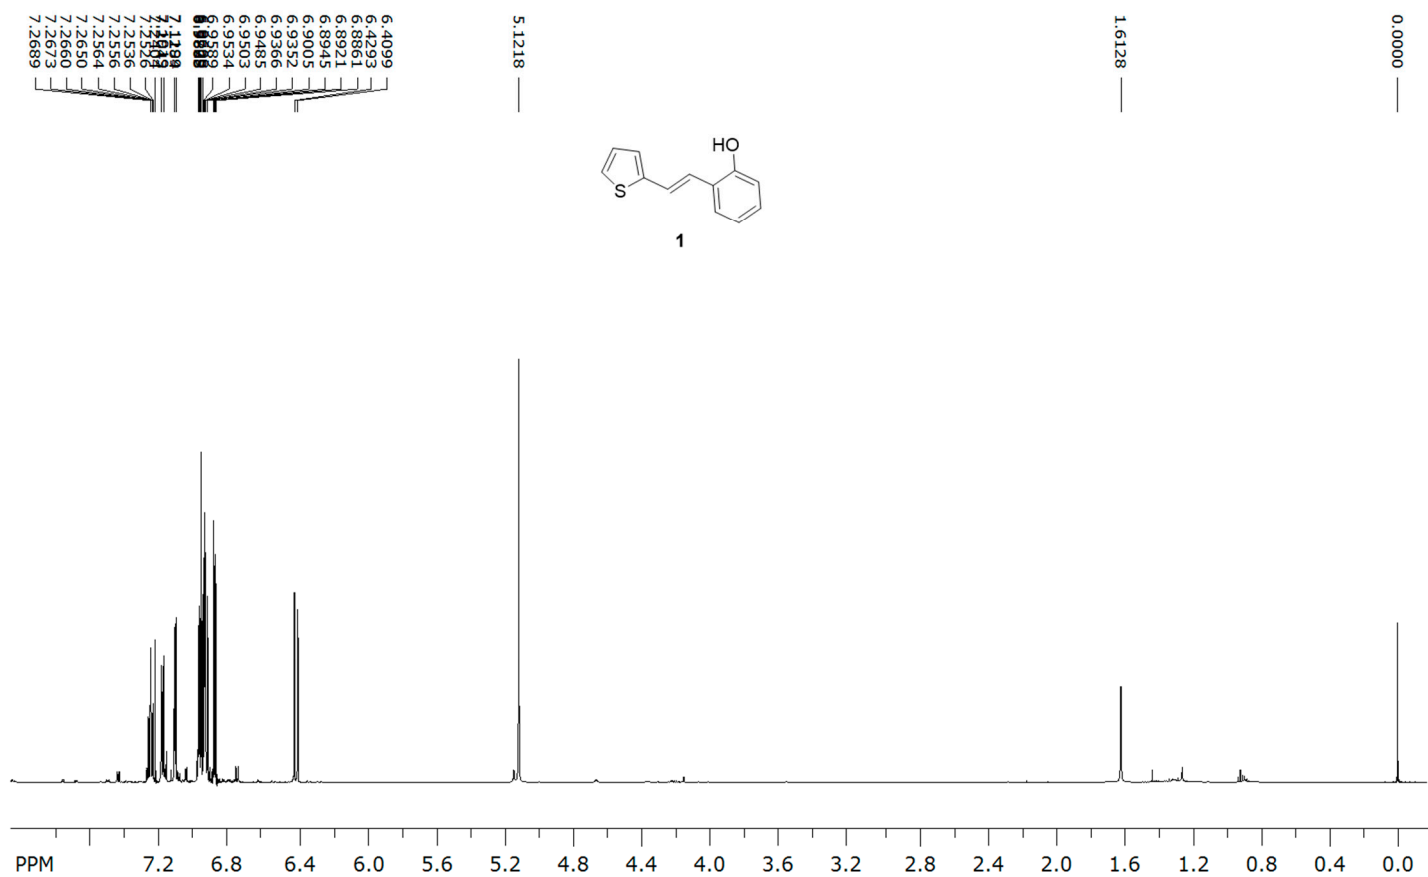

**Figure S29.**  $^1\text{H}$  NMR ( $\text{CDCl}_3$ ) spectrum of the photomixtures from **1** after 30' of direct irradiation at 365 nm in a batch reactor.

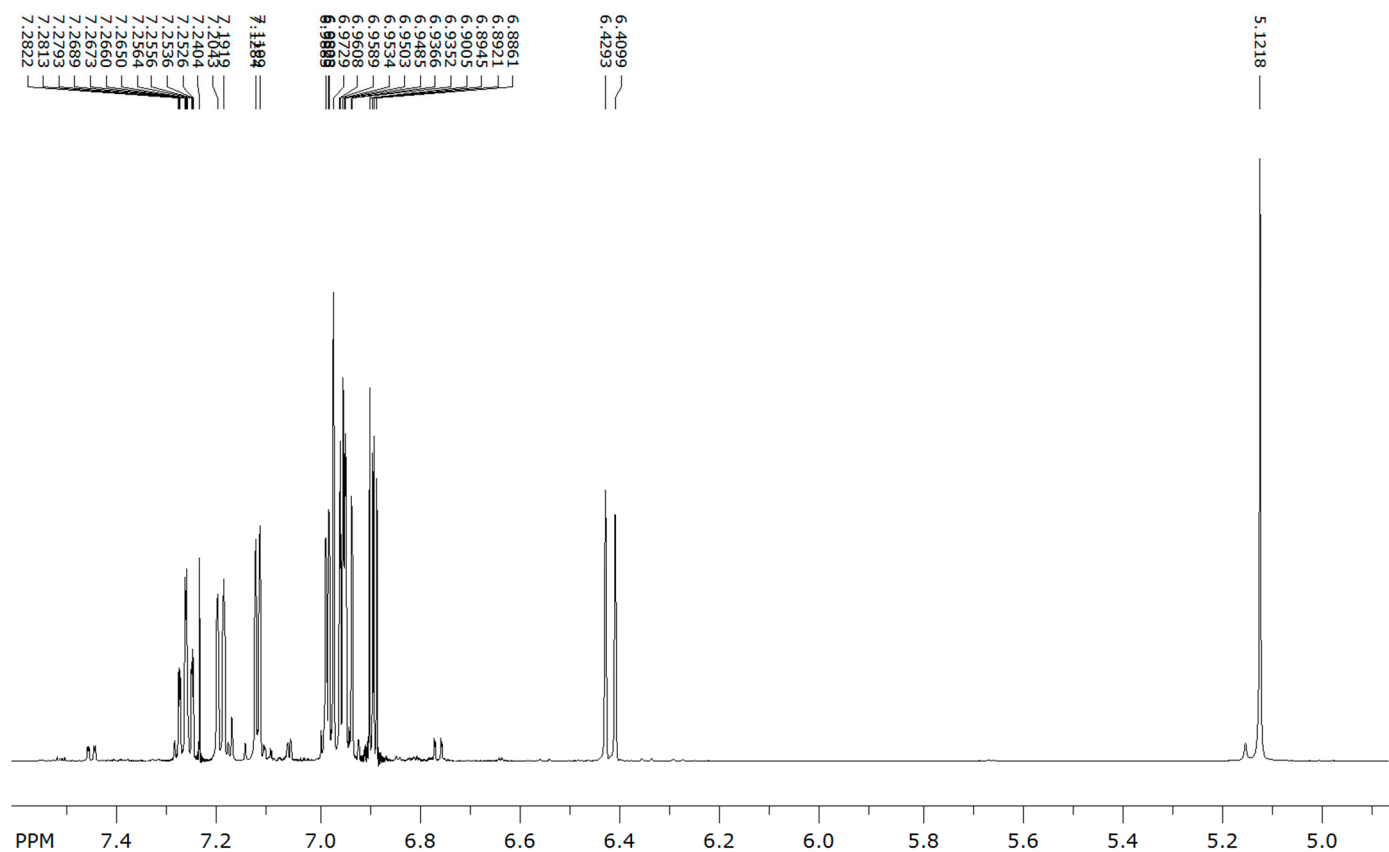

**Figure S30.** <sup>1</sup>H NMR (CDCl<sub>3</sub>) spectrum of aromatic part of the photomixtures from **1** after 30' of direct irradiation at 365 nm in a batch reactor.



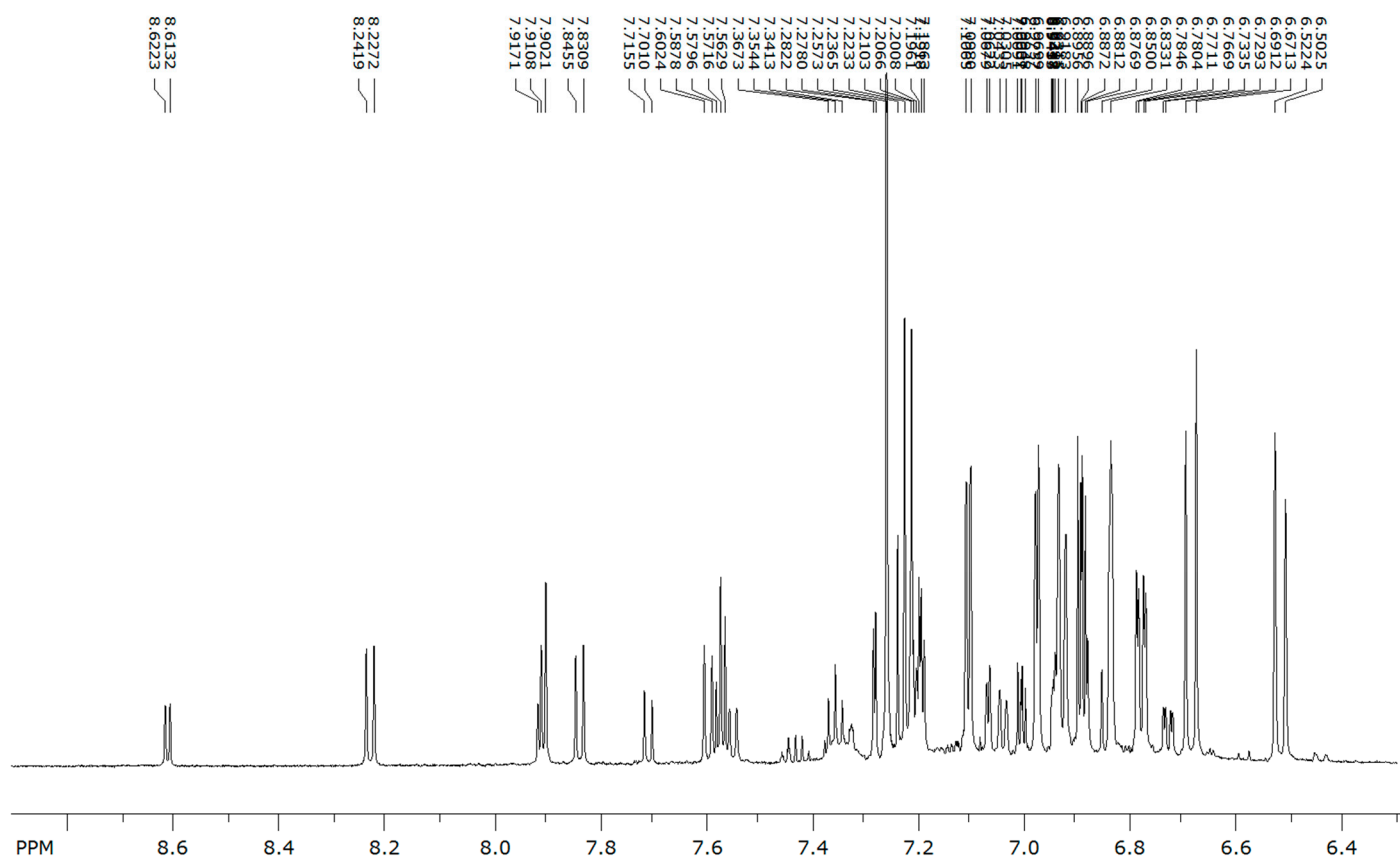

**Figure S32.**  $^1\text{H}$  NMR ( $\text{CDCl}_3$ ) spectrum of aromatic part of the photomixtures from **2** after 30' of direct irradiation at 365 nm in a batch reactor.

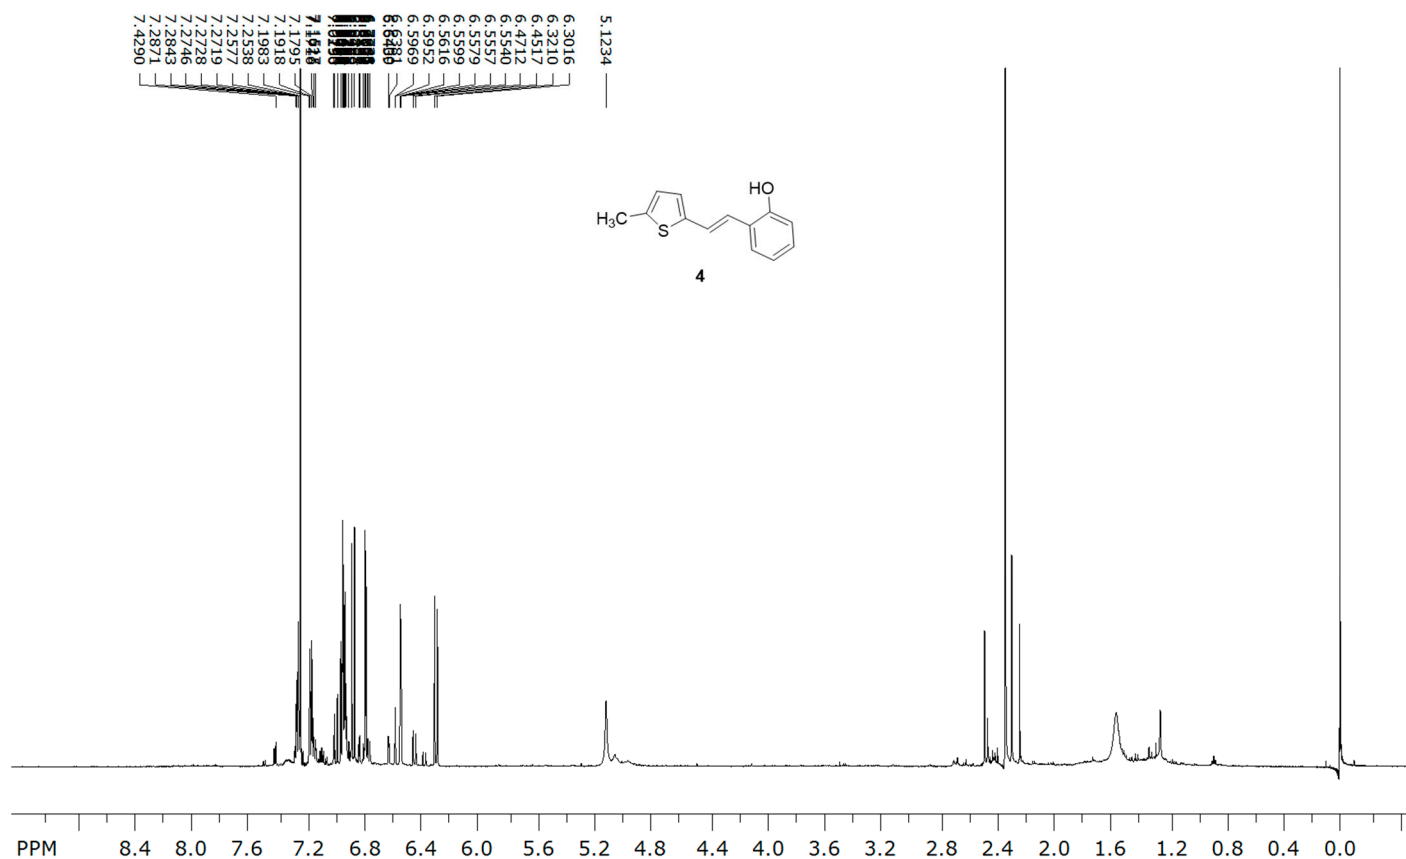

**Figure S33.**  $^1\text{H}$  NMR ( $\text{CDCl}_3$ ) spectrum of the photomixtures from **4** after 30' of direct irradiation at 365 nm in a batch reactor.

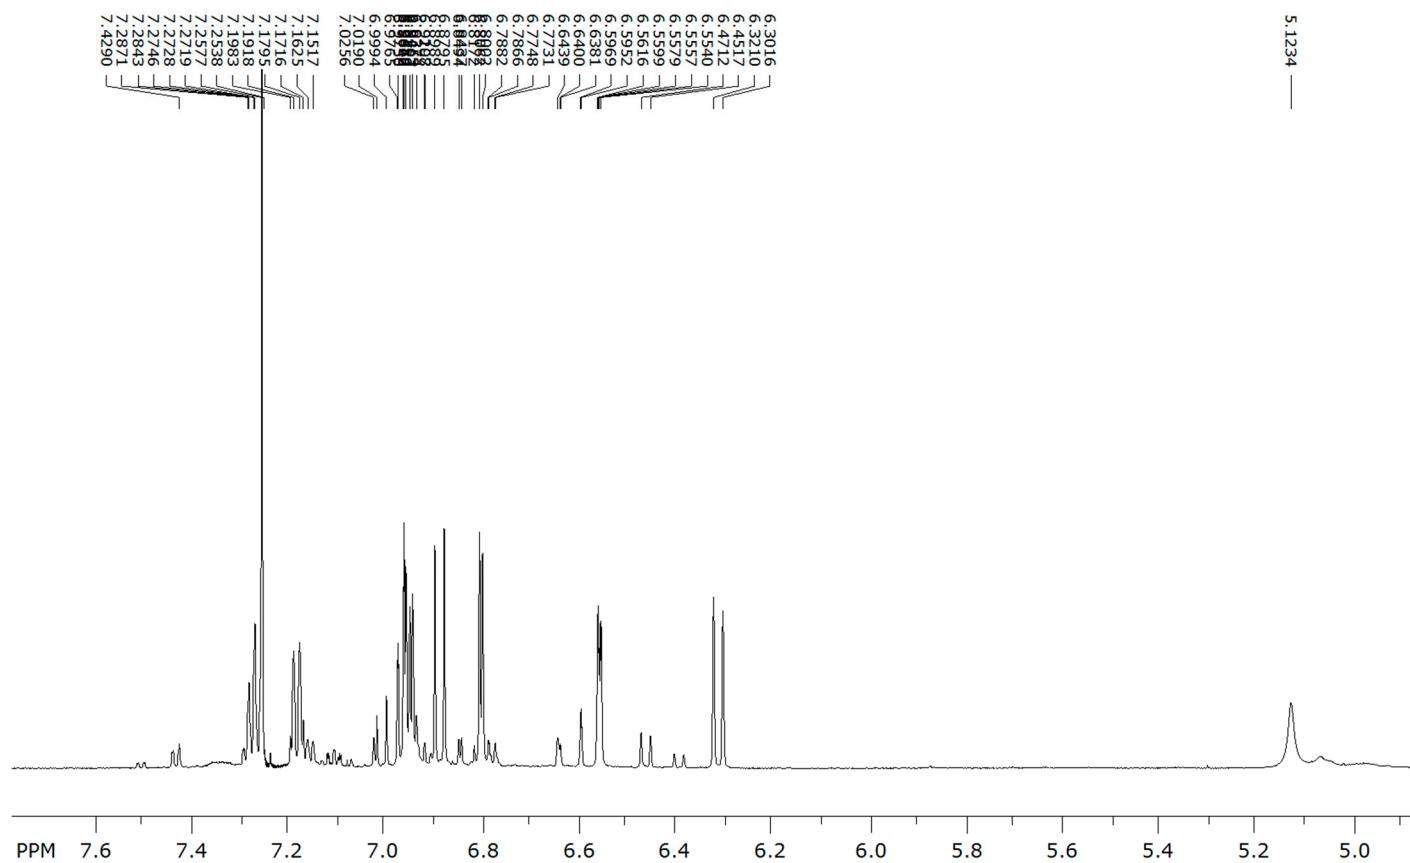

**Figure S34.**  $^1\text{H}$  NMR ( $\text{CDCl}_3$ ) spectrum of aromatic part of the photomixtures from **4** after 30' of direct irradiation at 365 nm in a batch reactor.
